1     **Staufen1 localizes to the mitotic spindle and controls the transport of**  
2                                   **RNA populations to the spindle**

3  
4     Sami Hassine<sup>1\*</sup>, Florence Bonnet-Magnaval<sup>1\*</sup>, Louis-Philip Benoit-Bouvrette<sup>1,2</sup>,  
5     Bellastrid Doran<sup>1</sup>, Mehdi Ghram<sup>1</sup>, Mathieu Bouthillette<sup>1</sup>, Eric Lecuyer<sup>1,2</sup>, and Luc  
6                                   DesGroseillers<sup>1,\*</sup>

7  
8     Département de biochimie et médecine moléculaire, Faculté de médecine, Université de  
9     Montréal, 2900 Édouard Montpetit, Montréal, QC, H3T 1J4, Canada<sup>1</sup>; Institut de  
10    Recherches Cliniques de Montréal, 110 Avenue des Pins Ouest, Montréal, QC, H2W  
11                                   1R7, Canada<sup>2</sup>

12  
13    **Running title:** STAU1-dependent localization of RNAs on mitotic spindle.

14  
15    \* **To whom correspondence should be addressed:**

16    Dr Luc DesGroseillers, Département de biochimie et médecine moléculaire, Faculté de  
17    médecine, Université de Montréal, 2900 Édouard Montpetit Montréal, QC, Canada. H3T  
18    1J4. Phone : 514-343-5802. Fax: 514-343-2210. Email: [luc.desgroseillers@umontreal.ca](mailto:luc.desgroseillers@umontreal.ca)

19  
20    \* The first two authors should be regarded as Joint First Authors.

## 1 **SUMMARY STATEMENT**

2 Proper localization and functions of macromolecules during cell division are crucial to  
3 ensure survival and proliferation of daughter cells.

4

## 1 **ABSTRACT**

2           Staufen1 (STAU1) is an RNA-binding protein involved in the posttranscriptional  
3 regulation of mRNAs. We report that a large fraction of STAU1 localizes to the mitotic  
4 spindle in the colorectal cancer HCT116 and in the non-transformed hTERT-RPE1 cells.  
5 Spindle-associated STAU1 partly co-localizes with ribosomes and active sites of  
6 translation. We mapped the molecular determinant required for STAU1/spindle association  
7 within the first 88 N-terminal amino acids, a domain that is not required for RNA binding.  
8 Interestingly, transcriptomic analysis of purified mitotic spindles reveals that 1054 mRNAs  
9 as well as the precursor ribosomal RNA and lncRNAs and snoRNAs involved in  
10 ribonucleoprotein assembly and processing are enriched on spindles compared to cell  
11 extracts. STAU1 knockout causes the displacement of the pre-rRNA and of 154 mRNAs  
12 coding for proteins involved in actin cytoskeleton organization and cell growth,  
13 highlighting a role for STAU1 in mRNA trafficking to spindle. These data demonstrate  
14 that STAU1 controls the localization of sub-populations of RNAs during mitosis and  
15 suggests a novel role of STAU1 in pre-rRNA maintenance during mitosis, ribogenesis  
16 and/or nucleoli reassembly.

17

18

19 **KEYWORDS:** Staufen1, RNA, localization, post-transcriptional regulation, mitotic  
20 spindle, RNA-Seq, ribosomal RNA.

21

22

## 1 INTRODUCTION

2 The localization of RNA molecules to specific subcellular compartments, a cellular  
3 mechanism that is crucial for normal progression of several biological processes, functions  
4 to spatio-temporally regulate gene expression (Neriec and Percipalle, 2018; Suter, 2018;  
5 Mayya and Duchaine, 2019). Coordination of this post-transcriptional mechanism is  
6 controlled by RNA-binding proteins (RBPs) that are thought to bind and regulate  
7 overlapping groups of functionally related RNAs (Keene, 2007; Van Nostrand et al.,  
8 2020). This mechanism may allow subpopulations of mRNAs to be tagged and  
9 functionally grouped into RNA regulons, and ensures that proteins involved in a specific  
10 pathway are translated in a highly coordinated fashion.

11 Staufen1 (STAU1) is a double-stranded RNA binding protein well known for its  
12 involvement in the post-transcriptional regulation of gene expression (Wickham et al.,  
13 1999; Marion et al., 1999). It is ubiquitously expressed in mammals as alternatively spliced  
14 transcripts that generate protein isoforms of 55 kDa (STAU1<sup>55</sup>, STAU1<sup>55i</sup>) and 63 kDa  
15 (STAU1<sup>63</sup>) (Wickham et al., 1999; Marion et al., 1999; Duchaine et al., 2000). A large  
16 fraction of STAU1-bound mRNAs are associated with translating ribosomes (Ricci et al.,  
17 2014; de Lucas et al., 2014; Luo et al., 2002). Genome-wide analyses reveal that STAU1-  
18 bound mRNAs code for proteins with heterogeneous functions including transcription,  
19 translation, cell growth and regulation of cell cycle (Ricci et al., 2014; de Lucas et al., 2014;  
20 Furic et al., 2008; Laver et al., 2013; LeGendre et al., 2013; Sugimoto et al., 2015). Through  
21 its binding to specific mRNA populations, STAU1 controls RNA splicing (Ravel-Chapuis  
22 et al., 2012), nuclear export (Elbarbary et al., 2013; Ravel-Chapuis et al., 2012), transport  
23 and localization (Kiebler et al., 1999; Vessey et al., 2008), translation (Ricci et al., 2014;

1 Dugre-Brisson et al., 2005; de Lucas et al., 2014; Jeong et al., 2019; Sugimoto et al., 2015),  
2 and decay (Kim et al., 2005; Kim et al., 2007). STAU1, via the post-transcriptional  
3 regulation that it imposes to its bound mRNAs, regulates a wide range of physiologic  
4 transcripts and metabolic pathways. STAU1 is crucial for cell differentiation (Kim et al.,  
5 2005; Belanger et al., 2003; Gautrey et al., 2008; Yamaguchi et al., 2008; Gong et al., 2009;  
6 Kretz, 2013; Cho et al., 2012), dendritic spine morphogenesis (Vessey et al., 2008; Lebeau  
7 et al., 2008), long-term synaptic plasticity (Lebeau et al., 2008), a cellular mechanism for  
8 long-term memory, response to stress (Thomas et al., 2009), and cell proliferation (Boulay  
9 et al., 2014). In addition, misregulation of STAU1-mediated post-transcriptional  
10 mechanisms of gene regulation accelerates cancer progression and regulates apoptosis (Xu  
11 et al., 2015; Xu et al., 2017; Liu et al., 2017; Damas et al., 2016; Sakurai et al., 2017).

12 Interestingly, STAU1 expression levels vary during the cell cycle (Boulay et al.,  
13 2014). STAU1 levels rapidly decrease as cells transit through mitosis. Its degradation is  
14 mediated by the ubiquitin-proteasome system following its association with the E3  
15 ubiquitin ligase anaphase promoting complex/cyclosome (APC/C) via its co-activators  
16 CDH1 and CDC20 (Boulay et al., 2014). Therefore, modulation of STAU1 levels by cell  
17 cycle effectors may dictate the post-transcriptional expression of its bound transcripts and  
18 may contribute to the control of cell proliferation. Accordingly, a moderate overexpression  
19 of STAU1 in cancer cells impairs mitosis progression and cell proliferation (Boulay et al.,  
20 2014; Wan et al., 2004). Strikingly, STAU1 overexpression has no effect in non-  
21 transformed hTERT-RPE1 and IMR90 cells (Boulay et al., 2014) indicating that the types  
22 and importance of cellular defects following a modulation of STAU1 levels depends on  
23 cellular contexts. Nevertheless, STAU1 is likely to play an important role during mitosis

1 in non-transformed cells as well since its depletion impairs mitosis progression (Ghram et  
2 al., submitted).

3 To understand the role of STAU1 during mitosis, we first documented its  
4 subcellular distribution, revealing that an important subpopulation of STAU1 associates  
5 with the mitotic spindle. Previous studies have shown that mRNAs can be found on mitotic  
6 spindles (Eliscovich et al., 2008; Groisman et al., 2000; Sharp et al., 2011; Blower et al.,  
7 2007; Sepulveda et al., 2018; Kingsley et al., 2007; Hussain et al., 2009) but the  
8 mechanisms of their transport, localization and post-transcriptional regulation are unclear.  
9 We now show that STAU1 is involved in RNA localization on spindle. Using RNA-Seq  
10 analysis, we identified RNAs that are enriched on spindles, in particular the 45S pre-rRNA  
11 precursor and multiple mRNAs. Interestingly, the pre-rRNA and several mRNAs are  
12 delocalized from spindles in HCT116 STAU1-knockout (STAU1-KO) cells compared to  
13 wild type (WT) cells. Finally, we show that STAU1 colocalizes with OP-puromycin  
14 suggesting that a fraction of STAU1-bound transcripts are locally translated on the mitotic  
15 spindles. Altogether, our results suggest that STAU1 regulates the transport/localization of  
16 different RNA biotypes and that it may contribute to rRNA maintenance during mitosis  
17 and thus to nucleolus reassembly.

18

## 1 **RESULTS**

### 2 **Localization of STAU1 to the mitotic spindle**

3 To visualize the subcellular localization of STAU1 during mitosis, colorectal  
4 cancer HCT116 cells (Fig 1) and non-transformed hTERT-RPE1 cells (Supp Fig S1) were  
5 synchronized in late G<sub>2</sub> by the CDK1 inhibitor RO-3306 and then released from the block  
6 with fresh medium. At different time points post-release, cells were solubilized with Triton  
7 X100, then fixed and stained with anti-STAU1 and anti- $\alpha$ -tubulin antibodies. DAPI  
8 staining was included to visualize DNA. Confocal microscopy analysis of mitotic cells  
9 revealed that a significant subpopulation of STAU1 co-localized with  $\alpha$ -tubulin on the  
10 mitotic spindles (Fig 1 A,B). During all phases of mitosis, STAU1 was observed at the  
11 poles of the spindle and also on fibers. During telophase, STAU1 was distributed in the  
12 cytoplasm of daughter cells and partly with the remains of polar spindle microtubules.  
13 Several controls were included to confirm the specificity of the antibodies (Supp Fig S2).

14

### 15 **Biochemical characterization of the mitotic spindle**

16 To confirm a tight association between STAU1 and components of the mitotic spindle, we  
17 biochemically purified spindles (Supp Fig S3A) and identified associated proteins by  
18 western blotting (Fig 2B; Supp Fig S1B). To prepare spindles, HCT116 and hTERT-RPE1  
19 cells were synchronized in late G<sub>2</sub> and released. Mitotic cells were incubated with taxol  
20 (Fig 2A) to stabilize microtubules and harvested by shake-off. Purified spindles were  
21 observed by microscopy to control for the quality of the preparations (Supp Fig S3B).  
22 Western blot analysis showed that STAU1<sup>55</sup> co-purified with tubulin in spindle  
23 preparations of both cancer (Fig 2B) and non-transformed (Supp Fig S1B) cells.

1 Interestingly, STAUI<sup>63</sup> isoform was not detected in the mitotic spindle fraction nor the  
2 paralogue protein Staufen2 (STAU2). As expected, aurora A, a known component of the  
3 spindle, was found in the spindle fraction while calnexin,  $\beta$ -actin and histone H3 used as  
4 negative controls were absent. As a further characterization of the spindle preparations, we  
5 showed that the ribosomal proteins S6 (RPS6) and L26 (RPL26) co-purified with spindles,  
6 suggesting that both the large and small subunits of the ribosomes, and thus the translation  
7 machinery, are present in spindle preparations.

8

### 9 **dsRBD2 is necessary and sufficient to link STAUI<sup>55</sup> to spindles**

10

11 As a first step to define how STAUI<sup>55</sup> binds to spindle components, we next evaluated the  
12 spindle targeting properties of STAU deletion mutants in order to map spindle association  
13 determinant. We first generated STAUI-KO HCT116 cell lines (Supp Fig S4A-F) that will  
14 prevent putative dimerization between exogenously expressed STAUI<sup>55</sup> mutants and  
15 endogenous STAUI (Martel et al., 2010). The growth rate of STAUI-KO (clone CR1.3)  
16 HCT116 cells was similar to that of WT cells (Supp Fig 4D). We then showed that  
17 transiently expressed STAUI<sup>55</sup>-FLAG<sub>3</sub> co-localized with spindles (Supp Fig S5A) and  
18 purified in spindle preparations (Supp Fig S5B) in STAUI-KO cells or in STAUI-control  
19 WT cells. Then, STAUI<sup>55</sup>-FLAG<sub>3</sub> deletion mutants (Fig 3A) were expressed and their  
20 presence in the spindle fraction analyzed by western blotting (Fig 3B,C). As shown in  
21 figure 3B, mutants that lost RNA-binding activity (3\*4\*;  $\Delta$ 3) (Luo et al., 2002) were  
22 present in the spindle fraction indicating that RNA binding activity is not required for  
23 spindle association. These results are consistent with our findings that STAUI<sup>55</sup> co-purified  
24 with spindles even when spindle preparations were treated with RNase prior to Western



1 blotting (Supp Fig S6). Similarly, deletion of the tubulin-binding domain ( $\Delta$ TBD) had no  
2 effect on the interaction with mitotic microtubules. Deletion of RBD4 ( $\Delta$ 4) or RBD5 ( $\Delta$ 5)  
3 had no consequence either. In contrast, a deletion that removed the first N-terminal 88  
4 amino acids of STAU1<sup>55</sup>-FLAG<sub>3</sub>, corresponding to RBD2 ( $\Delta$ 2), reduced STAU1<sup>55</sup>  
5 association with mitotic spindles. The reverse experiment in which RBD2-HA<sub>3</sub> and RBD4-  
6 TBD-HA<sub>3</sub>, used as control, were expressed in HCT116 STAU1-KO cells confirmed these  
7 results (Fig 4A-C): RBD2-HA<sub>3</sub> was found in the spindle fraction but not RBD4-TBD-HA<sub>3</sub>.  
8 These results indicate that RBD2 is necessary and sufficient for STAU1/spindle  
9 association.

10 To more finely map the molecular determinant involved in STAU1<sup>55</sup>/spindle  
11 association, progressive deletions were made in the N-terminal region and the resulting  
12 proteins were tested for their capacity to co-purify with spindles (Fig 4D-F). Western  
13 blotting of spindle-associated proteins showed that deletion of the first 25 residues ( $\Delta$ 25)  
14 of STAU1<sup>55</sup> did not prevent STAU1<sup>55</sup> association with the spindle whereas deletion of the  
15 first 37 N-terminal residues ( $\Delta$ 37) abrogated this association. These results indicate that  
16 the molecular determinant involved in STAU1<sup>55</sup>/spindle association is located within  
17 amino acids 26 and 37.

18

## 19 **Transcriptomes of WT and STAU1-KO cells**

20 Given the well-established and conserved role of STAU1 in the regulation of post-  
21 transcriptional gene expression, it is likely that STAU1<sup>55</sup> is responsible for the transport  
22 and/or localization of specific RNAs to the spindle as well as for their post-transcriptional  
23 regulation while associated with this structure. Therefore, to highlight a putative role of

1 STAU1<sup>55</sup> in the transport of RNAs to spindles, we biochemically purified mitotic spindles  
2 from parental WT and STAU1-KO cells and identified spindle-associated RNAs by RNA-  
3 Seq (Supp Table S1). Total RNAs from WT and STAU1-KO mitotic cells were also  
4 sequenced to normalize for putative changes in cell transcriptomes due to STAU1 ablation.  
5 RNA Pico chips analysis showed the quality of RNA preparations (Supp Fig S7) and a  
6 PCA plot (Khatua et al., 2003) showed that sequencing data are grouped together according  
7 to the sources of RNA preparations used (MS or IN) indicating reproducibility of the  
8 replicates (Supp Fig 8A). It also indicates that data from whole-cell RNA preparations are  
9 different from those from mitotic spindle preparations. Similar conclusions were reached  
10 from the calculation of coefficients of correlation between samples (Supp Fig S8B-E).

11 Comparison of RNA biotypes in total cell extracts (Fig 5A) indicated that the  
12 relative expression of RNA types per million reads in the transcriptomes of WT and  
13 STAU1-KO cells is similar (Table 1). Almost half of the reads corresponded to protein  
14 coding RNAs. Using FPKM of 1 as a threshold value for gene expression, only 108  
15 individual RNAs were found to have altered expression in STAU1-KO cells compared to  
16 WT cells (fold change  $\geq 2$ , adjusted p-value  $\leq 0.05$ ) (Supp Table S1). 35 protein-coding  
17 mRNAs and four lncRNA were upregulated whereas 68 protein-coding mRNAs and one  
18 lncRNA were downregulated (Supp Table S2).

19

## 20 **Genome-wide identification of mitotic spindle-enriched RNAs**

21 A different pattern was observed with spindle preparations (Fig 5A, Table 1). The relative  
22 expression per million reads of protein coding RNAs was higher in mitotic spindle  
23 preparations of STAU1-KO cells compared to WT cells whereas that of miRNAs and

1 rRNAs was lower. Strikingly, the huge decrease of miRNAs and rRNAs is essentially due  
2 to three highly abundant RNAs in spindle preparations, RNA28S5, mir3648 and mir3687  
3 (Table 1). Interestingly, the chromosomal location of mir3648 and mir3687 is within the  
4 RNA28S5 45S pre-rRNA locus (Fig 5B), suggesting that the two miRNA sequences are  
5 present in spindle preparations within the pre-rRNA transcript and not as mature miRNAs.  
6 This huge decrease in the number of reads (TPM) of rRNAs and miRNAs in STAU1-KO  
7 spindles compared to WT spindles results in a sur-representation of all other RNA biotypes,  
8 including protein-coding transcripts, in STAU1-KO spindle (Table 1). To confirm the  
9 presence of pre-rRNA in spindle preparations, we RT-qPCR-amplified spindle-associated  
10 RNAs with oligonucleotide primers positioned on either side of the 5'ETS/18S and  
11 ITS1/5.8S junctions (Fig 5B). Our results indicated that the spacer fragments were linked  
12 to ribosomal sequences and therefore that the precursor rRNA is highly enriched in spindle  
13 preparations (Fig 5C). Sequences corresponding to mature 18S and 28S rRNAs were also  
14 very abundant in the spindle preparations, but they were not enriched compared to input  
15 because they are also present as abundant cytoplasmic ribosomes. These results indicate  
16 that the precursor 45S rRNA is an important component of the spindle transcriptome.

17 We then identified other spindle-enriched RNAs in WT cells. We plotted the  
18 amount of each RNA (FPKM) in the mitotic spindle preparations in function of their  
19 amount in total cell extracts (Fig 5D) and analyzed the frequency of RNAs in function of  
20 their enrichment in mitotic spindle preparations compared to cell extracts (Fig 5E). These  
21 results identified 1642 RNAs that are enriched at least twice ( $p$ -value  $\leq 0,05$ ) in spindle  
22 preparations compared to total cell extracts, including 1054 protein-coding transcripts  
23 (Supp Table S3,S4). 28% of these mRNAs are known to bind STAU1 (Furic et al., 2008;

1 Boulay et al., 2014; Ricci et al., 2014; Sugimoto et al., 2015; de Lucas et al., 2014). These  
2 mRNAs code for proteins involved in cellular processes such as cell differentiation,  
3 GTPase activity, microtubule-based processes, and chromatin organization and  
4 modification (Supp Table S5). In addition, the pre-rRNA as well as snoRNAs involved in  
5 pre-rRNA processing and MALAT1, a scaffold lncRNA involved in ribonucleoprotein  
6 assembly, were highly enriched (Supp Table S3).

7

### 8 **STAU1<sup>55</sup>-mediated localization of RNAs on mitotic spindle**

9 To identify RNAs whose localization to the spindle is dependent on STAU1, we compared  
10 the amount of individual RNA in spindle preparations of WT and STAU1-KO cells. We  
11 normalized the amount of each RNA in the spindle preparations to that in cell extracts  
12 (RNA-spindle/RNA-input) and then compared the ratios in STAU1-KO vs WT cells. We  
13 identified 771 individual RNAs, including RNA28S5, miRNAs (including mir3648 and  
14 mir3687) and 154 protein-coding mRNAs whose amount in the spindle preparations is at  
15 least two-fold lower in STAU1-KO cells than in WT cells (Fig 5F) (Supp Table S6). A  
16 different pattern appears with the analysis of TPM: the most important decrease concerns  
17 the pre-rRNA and its associated miRNAs while protein-coding transcripts represented only  
18 2% of the total decreased reads (Fig 5F). 29.2% of the protein-coding mRNAs are known  
19 to bind STAU1. Among the remaining mRNAs that do not bind STAU1, 60% (60/109) are  
20 only marginally expressed (FPKM<2). Bioinformatic analysis (Metascape, A Gene  
21 Annotation & Analysis Resources (Tripathi et al., 2015)) indicates that the proteins  
22 encoded by these STAU1-bound mRNAs are enriched in GO terms related to regulation of

1 cell shape, actin-cytoskeleton organization, negative regulation of cell growth and  
2 differentiation (Supp Table S7).

3 To confirm the STAU1-mediated differential association of RNAs with spindles of  
4 WT and KO cells, selected RNAs were quantified in cell extracts and spindle preparations  
5 of WT and STAU1-KO cells by RT-qPCR. Two different STAU1-KO cell lines, generated  
6 with different guide RNAs (Supp Fig S4), were used to exclude putative off-target effects.  
7 Based on RNA-Seq data, we studied several RNAs whose amounts were decreased in  
8 spindle preparations of STAU1-KO cells compared to that of WT cells and are known  
9 targets of STAU1 binding. *Hprt* and *rpl22* mRNAs were used as negative controls to  
10 normalize data. As expected from RNA-Seq data, the 45S precursor rRNA was delocalized  
11 from the spindles of STAU1-KO cells compared to WT cells (Fig 6A) as well as *mex3d*,  
12 *fam101b* and *nat8l* mRNAs (Fig 6B). Used as control, the level of *aspm* RNA was  
13 unchanged in STAU1-KO spindle extracts compared to WT extracts.

14

## 15 **STAU1<sup>55</sup> co-localizes with ribosomes and active sites of translation on the mitotic** 16 **spindle**

17 The biochemical characterization of spindle-associated proteins indicated that ribosomal  
18 proteins co-purified with tubulin and STAU1<sup>55</sup> in spindle preparations (Fig 2). To study  
19 the link between ribosomes, spindles and STAU1<sup>55</sup>, we documented their subcellular  
20 localization during mitosis (Fig 7). Using confocal microscopy, we first showed that a  
21 significant subpopulation of the ribosomal protein S6 co-localized with tubulin (Fig 7A)  
22 and with STAU1 (Fig. 7B) on the mitotic spindle both at the poles and on fibers. Then, we  
23 treated cells with O-propargyl-puromycin, a marker of active translation (Chao et al.,

1 2012). The signal was detected by confocal microscopy along with those generated by anti-  
2 tubulin and anti-STAU1 antibodies (Fig 7C). Our results indicated that foci of active  
3 translation co-localized with subpopulations of both tubulin and STAU1 on the mitotic  
4 spindle of individual cells, suggesting that a subpopulation of STAU1-bound mRNAs is  
5 locally translated on the spindle while others are not.  
6

## 1 **DISCUSSION**

2 In this paper, we show that STAU1<sup>55</sup> associates with the mitotic spindles in both  
3 transformed HCT116 and non-transformed hTERT-RPE1 cells. STAU1<sup>55</sup> is present in  
4 mitotic spindle preparations and co-localizes with tubulin and active sites of translation on  
5 the mitotic spindle. This is consistent with previous large scale proteomic studies that  
6 identified STAU1 as a spindle component of the human (Rao et al., 2016) and hamster  
7 (Bonner et al., 2011) mitotic apparatus. In contrast, STAU1<sup>63</sup> was not found in spindle  
8 preparations. This was unexpected since the sequence of STAU1<sup>55</sup> is entirely included in  
9 that of STAU<sup>63</sup> (Wickham et al., 1999). It is likely that the additional amino acids at the N-  
10 terminus of STAU<sup>55</sup> to generate STAU1<sup>63</sup> change the structure of the molecular  
11 determinant involved in STAU1<sup>55</sup> association with the spindle and make it inaccessible for  
12 protein interaction. Similarly, the paralog STAU2 is not associated with the spindle,  
13 consistent with recent observations that failed to localize STAU2 to mitotic spindle,  
14 although it co-localizes with spindle at meiosis I and II (Cao et al., 2016). The human  
15 paralogues independently evolved from an ancestor gene to acquire differential biological  
16 functions while keeping conserved molecular characteristics. Although the human  
17 paralogues are both RNA-binding proteins, they bind mainly different sets of mRNAs  
18 (Furic et al., 2008) and are essentially present in distinct ribonucleoprotein complexes  
19 (Duchaine et al., 2002). Accordingly, they play different roles in spines morphogenesis  
20 (Lebeau et al., 2008; Goetze et al., 2006) and synaptic activity (Lebeau et al., 2008; Lebeau  
21 et al., 2011). Interestingly, in drosophila embryo, Staufen protein moves to the pole of the  
22 mitotic spindles in close association with the astral microtubules when bicoid 3'UTR  
23 mRNA is injected (Ferrandon et al., 1994).

## 1 **Molecular determinant involved in STAU1<sup>55</sup>-spindle association**

2 STAU1 is a multi-functional protein with several determinants that control its molecular  
3 functions. Notably, BD3 and RBD4 regulate STAU1 RNA-binding activity (Wickham et  
4 al., 1999) and RBD4-TBD is involved in ribosome association (Luo et al., 2002). We now  
5 show that STAU1 association with spindles requires the N-terminal region that contains  
6 RBD2, a domain devoid of RNA-binding activity in vitro (Wickham et al., 1999), although  
7 we do not exclude the possibility that RBD2 could bind RNA in vivo as reported for the  
8 paralogue protein STAU2 (Heber et al., 2019). This result indicates that STAU1 RNA-  
9 binding and ribosome-binding activities are not involved in spindle association. It is  
10 interesting to note that deletion of the C-terminal RBD5 facilitates RBD2/spindle  
11 association (Fig 3 and 4). This is consistent with previous data showing an interaction  
12 between RBD2 and RBD5 (Martel et al., 2010) and indicates that RBD5 may regulate the  
13 functions of RBD2. RBD2 was also previously shown to bind CDC20 and CDH1 resulting  
14 in STAU1 ubiquitination and degradation during mitosis (Boulay et al., 2014) and to be  
15 required for impaired cell proliferation (Boulay et al., 2014). Although mapped in RBD2,  
16 the three functions are probably not linked as their molecular determinants do not overlap  
17 (unpublished data). In addition, the region of RBD2 involved in STAU1-spindle  
18 association (aa 25-37) is also required to increase Pr55<sup>Gag</sup> multimerization and HIV particle  
19 release (Chatel-Chaix et al., 2008) suggesting that HIV Gag may hijack STAU1 function  
20 to favor its own replication. Understanding the role of STAU1 on the mitotic spindle may  
21 be crucial not only to decipher new pathways leading to cell proliferation but also to  
22 discover new steps in RNA virus replication and therefore novel approaches to interfere  
23 with them.



1           The mechanism by which the N-terminal determinant (M<sup>26</sup>RGGAYPPRYFY<sup>37</sup>)  
2 allows STAU1<sup>55</sup> association with spindles is not known. Interestingly, in drosophila, a  
3 proline-rich loop in dsRBD2 is required for the microtubule-dependent localization of *osk*  
4 mRNA but not for *Staufen* association with *osk* mRNA or for activation of its translation  
5 (Micklem et al., 2000). However, mutation of the two prolines (P32A-P33A) did not  
6 prevent STAU1 association with spindle (unpublished data), indicating that other amino  
7 acids are involved. It will be of interest to test if mutations that prevent tyrosine  
8 phosphorylation (Y35 and Y37) or arginine methylation (R27 and R34) (PhosphoSitePlus  
9 (Hornbeck et al., 2015)) impair STAU1<sup>55</sup>-spindle association. Alternatively, the N-  
10 terminal motif may recruit ubiquitin ligase through two potential ESCRT targeting  
11 domains (P<sup>32</sup>PRY and Y<sup>37</sup>PFVPPPL) that, in turn, targets the protein to the ESCRT  
12 machinery. Interestingly, several ESCRT proteins localize to mitotic microtubules and play  
13 important roles throughout mitosis in centrosome localization and duplication, spindle  
14 organization and stability, kinetochore attachments, spindle checkpoint, nuclear envelop  
15 reassembly and cytokinesis (Dionisio-Vicuna et al., 2018; Morita et al., 2010; Petsalaki et  
16 al., 2018; Petsalaki and Zachos, 2018; Vietri et al., 2015).

17

### 18 **Spindle-enriched RNAs**

19 Large scale RNA-Seq experiments identified RNAs that are enriched in spindle  
20 preparations compared to total cell extracts, including many protein-coding transcripts  
21 (Supp Table S3) (Blower et al., 2007). The fate of these transcripts is not clear. Although  
22 it is accepted that essential proteins required for mitosis are synthesized prior to prophase,  
23 several studies have shown that mitotic translation (Groisman et al., 2000) and inhibition

1 of cap-dependent translation (Wilker et al., 2007) are important for proper mitotic  
2 progression. For example, active translation is needed from late prophase to prometaphase  
3 to synthesize proteins that determine the duration of mitosis exit (Cummins et al., 1966).  
4 Large scale ribosome profiling experiments confirmed that proteins are synthesized during  
5 mitosis (Stumpf et al., 2013; Tanenbaum et al., 2015; Park et al., 2016; Aviner et al., 2013).  
6 However, whether translation occurs on the spindle, in the cytoplasm or both is unknown.

7       The presence of ribosomes and of active sites of translation suggests that translation  
8 can occur on spindle, consistent with the presence of several spindle-associated mRNAs in  
9 the lists of proteins that are translated during mitosis (Aviner et al., 2013). Mitotic  
10 translation indeed contributes to the protein content of the mitotic apparatus (Blower et al.,  
11 2007). Consistently, depletion of several of these spindle-enriched mRNAs by RNA  
12 interference impairs normal spindle pole organization and  $\gamma$ -tubulin distribution (Sharp et  
13 al., 2011), indicating that local translation of these mRNAs on spindle is beneficial for  
14 mitosis progression. Interestingly, no correlation was established between the spindle-  
15 enrichment of specific mRNAs and their translation on the spindle (Sharp et al., 2011).  
16 Therefore, it was proposed that some transcripts are spatially translated on spindles  
17 whereas others are translationally-inactive cargos that are later segregated into daughter  
18 cells (Blower et al., 2007).

19       Strikingly, one of the most abundant RNAs on spindle is the RNA28S5  
20 corresponding to the 45S pre-ribosomal RNA. This pre-rRNA is transcribed by RNA  
21 polymerase I from multiple 45S rDNA repeat units organized into five clusters on different  
22 chromosomes. During interphase, pre-rRNA is found in the nucleolus where it is processed  
23 to form mature 18S, 5.8S and 28S rRNAs and assembled into ribosomes (Hernandez-

1 Verdun, 2011). During prophase, the nucleolus is disassembles and rDNA transcription as  
2 well as pre-rRNA processing is arrested for the time of mitosis. The 45S pre-ribosomal  
3 RNA is maintained during mitosis and was shown to be present in the cytoplasm (Shishova  
4 et al., 2011) and at the chromosome periphery together with pre-rRNA processing factors  
5 (Sirri et al., 2016; Shishova et al., 2011). During telophase/early G<sub>1</sub>, the nucleolus is  
6 reassembled and the mitosis-inherited 45S pre-rRNA is required for regulating the  
7 distribution of components to reassembling daughter cell nucleoli (Carron et al., 2012;  
8 Dundr et al., 2000). Our study now indicates that the pre-rRNA, as well as numerous  
9 snoRNAs involved in rRNA maturation, are associated with the mitotic spindle during  
10 mitosis allowing their segregation into the two daughter cells and reassembly of the  
11 nucleoli. The presence of the full-length pre-rRNA on spindle contrasts with previous  
12 observation in the clam *Spisula* that only the processed rRNA spacers, but not the full-  
13 length precursor, are associated with centrosomes during meiosis (Alliegro and Alliegro,  
14 2013).

15

#### 16 **STAU1<sup>55</sup>-dependent localization of mRNAs on the mitotic spindle**

17 Using WT and STAU1-KO cells, we identified RNAs that are delocalized from the spindle  
18 when STAU1 is depleted. Since their overall expression in total cell extracts is not changed  
19 in STAU1-KO compared to wild-type cells, these results indicate that STAU1<sup>55</sup> is  
20 responsible for the transport/localization of RNA populations to the spindle. Strikingly, the  
21 45S pre-rRNA accounts for most of the reduced reads that are observed in STAU1-depleted  
22 cells, revealing a novel role for STAU1<sup>55</sup> in nucleolus functions and reassembly. STAU1  
23 was previously shown to be associated with ribosomes (Luo et al., 2002) and to enhance

1 translation when bound to the 5'UTR of mRNAs (Dugre-Brisson et al., 2005). In addition,  
2 STAU1 was shown to transit through the nucleolus where it is thought to be involved in  
3 ribosome and/or ribonucleoprotein biogenesis (Martel et al., 2006). Our results now add an  
4 additional putative role of STAU1 in pre-rRNA trafficking during mitosis and nucleolus  
5 reassembly in daughter cells.

6 Trafficking of other RNA populations is also altered in STAU1-KO cells. The  
7 number of different protein-coding transcripts represents a relatively small percentage of  
8 delocalized RNA molecules (20%) and only 2% of the delocalized reads. We believe that  
9 this is an under-representation of the number of delocalized STAU1-bound transcripts due  
10 to the incorporation of additional reads required to compensate the huge decrease of rRNA  
11 (TPM) in STAU1-KO spindles compared to WT spindles. The fate of these mRNAs on  
12 spindle is unknown. It is likely that a subpopulation of mRNAs on spindle is locally  
13 transcribed consistent with the colocalization of STAU1<sup>55</sup> with active sites of translation.  
14 Another subpopulation of STAU1-bound mRNAs is likely sequestered to the spindle in a  
15 translationally inactive form, and subsequently released and translated during G<sub>1</sub>.  
16 Consistently, large scale ribosomal profiling (Stumpf et al., 2013; Tanenbaum et al., 2015;  
17 Park et al., 2016) of G<sub>2</sub>, M and G<sub>1</sub> synchronized cells identified over 300 mRNAs whose  
18 translation is up- or down-regulated during mitosis vs G<sub>1</sub> or G<sub>2</sub> while the amounts of their  
19 corresponding mRNAs remained unchanged. At least 18 of the 154 mRNAs shown to be  
20 delocalized from the mitotic spindle in Stau1 KO cells were among those whose translation  
21 is regulated. Interestingly, all of them but one show reduced translation during mitosis.  
22 Strikingly, 14 of these 18 mRNAs are known targets of STAU1, suggesting that STAU1  
23 may be a critical factor in a mechanism of translation inhibition during mitosis. Finally, we

1 exclude mRNA degradation by the STAU1-mediated decay (SMD) pathway since we  
2 previously showed that STAU1-UPF1 association, required for SMD, is inhibited in  
3 mitosis (unpublished data).

4 Thus, STAU1 controls, in different cellular compartments, different sub-  
5 populations of pre-rRNAs and mRNAs that likely regulate cell decision during mitosis.  
6 Via the post-transcriptional regulation that it imposes to its bound RNAs, STAU1  
7 regulates crucial functions and deregulation of this mechanism may explain the  
8 proliferation defects observed in non-transformed cells upon STAU1 depletion (Ghram  
9 et al., submitted).

10

## 1 MATERIAL AND METHODS

### 2 Plasmids and reagents

3 Plasmids coding for STAU1 $\Delta^2$ -HA<sub>3</sub>, STAU1 $\Delta^3$ -HA<sub>3</sub>, STAU1 $\Delta^4$ -HA<sub>3</sub>, STAU1 $\Delta^5$ -HA<sub>3</sub>,  
4 STAU1 $\Delta^{\text{TBD}}$ -HA<sub>3</sub>, STAU1<sup>3\*-4\*</sup>-HA<sub>3</sub>, STAU1 $\Delta^{25}$ -HA<sub>3</sub>, STAU1 $\Delta^{37}$ -HA<sub>3</sub>, as well as RBD2-  
5 HA<sub>3</sub> and RBD4-TBD-HA<sub>3</sub> were previously described (Luo et al., 2002; Martel et al., 2010;  
6 Chatel-Chaix et al., 2008; Wickham et al., 1999; Boulay et al., 2014). Monoclonal (1/1000)  
7 and rabbit (1/1000) anti-STAU1 antibodies were previously described (Dugre-Brisson et  
8 al., 2005; Rao et al., 2019), respectively. Anti- $\beta$ -actin (A5441, clone AC-74. 1/5000), anti-  
9 STAU2 (HPA0191551/500), anti- $\alpha$ -tubulin (T6074, batch number 023M4813. 1/40000),  
10 and anti-HA (H6908, batch number 115M4872v. 1/1000) antibodies were purchased from  
11 Sigma-Aldrich. Anti-aurora A (30925, batch number 2. 1/2000), anti- $\alpha$ -tubulin (for IF,  
12 ab18251, batch number GR201260-1. 1/40000) and anti-histone H3 (ab1791, batch  
13 number GR204148-1. 1/3000) antibodies were purchased from Abcam. Anti-calnexin (sc-  
14 11397, batch number C1214. 1/1000) antibody was obtained from Santa Cruz. Anti-RPS6  
15 (2212, batch number 4. 1/1000) was purchased from Cell Signaling. Anti-RPL26,  
16 (GTX101833. 1/1000) and anti-STAU1 (for IF, GTX106566. 1/200) was obtained from  
17 Genetex. Goat polyclonal anti-mouse (p0447, batch number 20051789. 1/3000) and anti-  
18 rabbit (p0448, batch number 20017525. 1/5000) antibodies were purchased from Dako.

19

### 20 Cell culture

21 The human cell lines hTERT-RPE1 and HCT116 were obtained from ATCC (Manassas,  
22 USA). Human colorectal HCT116 cells and STAU1-KO CRISPR-derived clones  
23 were cultured in McCoy's medium with 10% fetal bovine serum, 20 mM glutamine and 1%

1 penicillin–streptomycin (Wisent). The human cell line hTERT-RPE1 was cultured in  
2 Dulbecco modified Eagle's medium (Invitrogen) supplemented with 10% cosmic calf  
3 serum (HyClone) or fetal bovine serum (Wisent), 100 µg/ml streptomycin and 100 units/ml  
4 penicillin (Wisent). Cells were cultured at 37°C under a 5% CO<sub>2</sub> atmosphere.

5

#### 6 **STAU1-KO HCT116 cell lines**

7 STAU1-KO HCT116 cells were generated by the CRISPR/Cas9 technology (Jinek et  
8 al., 2012). Briefly, HCT116 cells were transfected with plasmid coding for GFP, Cas9  
9 and a sgRNA targeting exon 6 of the *STAU1* gene (Horizon Discovery), using  
10 Lipofectamine 3000 (Life Technologies/Thermo Fisher). Forty-eight hours post-  
11 transfection, GFP positive cells were sorted by FACS and individual cells were grown  
12 into 96-well plates until colonies formed. Loss of STAU1 expression was monitored by  
13 western blotting using anti-STAU1 antibody. For growth curve assays, cells were  
14 harvested every day and the number of cells was counted with an automatic cell counter  
15 TC20 (Bio-Rad). The STAU1-KO clone CR1.3 was used in all experiments requiring  
16 STAU1 depletion. Clone CXR2.9 was used in the RT-qPCR experiment.

17

#### 18 **Cell lysates and immunoblotting**

19 Cells were harvested in phosphate buffered saline (PBS) and lysed in Tris-SDS Buffer  
20 (250 mM Tris–HCl pH 7.5, 15 mM EDTA, 0.5% Triton X-100, 5% (w/v) SDS,  
21 100 mM NaCl and 1 mM dithiothreitol) supplemented with a cocktail of protease and  
22 phosphatase inhibitors (Sigma-Aldrich) for 10 minutes. Proteins were separated by sodium  
23 dodecyl sulfate polyacrylamide gel electrophoresis (SDS-PAGE) and transferred to

1 nitrocellulose membranes (Millipore). Membranes were blocked for 1 hour in PBST (1×  
2 PBS, 0.05% Tween 20) containing 5% non-fat dry milk. Primary antibodies were prepared  
3 in 1% (w/v) skim milk in PBS-Tween20 (0,2%) and 0,1% (w/v) sodium azide. Membranes  
4 were incubated at room temperature with antibodies for one hour or 16 h (anti-STAU2).  
5 Secondary antibodies were prepared in 2,5% (w/v) skim milk in PBS-Tween20 (0,2%).  
6 Membranes were incubated at room temperature for 1 h with polyclonal goat anti-  
7 mouse (Dako) or anti-rabbit (Dako) HRP-conjugated secondary antibodies. Antibody-  
8 reactive bands were detected with chemiluminescence substrate ECL kit (GE Healthcare)  
9 using ChemiDoc™ MP Systems (Bio-Rad) or X-ray films (Fujifilm).

10

### 11 **OP-puromycin**

12 Active sites of translation were visualized with the Click-iT® Plus OPP Protein Synthesis  
13 Assay Kit (Thermofisher) as recommended by the manufacturer. Briefly, cells were  
14 incubated with 20 µM Click-iT OPP solution for 30 min, fixed in 3.7% formaldehyde in  
15 PBS for 15 min and permeabilized in 0.5% Triton X100 for 15 min. OPP was detected with  
16 Click-iT Plus OPP reaction cocktail. Images were acquired with an inverted Axio Observer  
17 Z1 confocal spinning disk microscope (ZEISS). Images was processed with the Zen elite  
18 blue edition or ImageJ software.

19

### 20 **Immunofluorescence microscopy**

21 Cells were seeded onto poly-L-lysine-treated 20 mm coverslips in a six-well plate at 40%  
22 confluence and incubated overnight at 37°C. Cells were permeabilized in 150 mM NaCl,  
23 10 mM Tris (pH 7.7), 0.5% Triton-X-100 (v/v) and 0.1% BSA (w/v) for 5 minutes and then



1 fixed with 4% paraformaldehyde in PBS for 10 minutes at room temperature. Fixed cells  
2 were washed thrice in PBS and blocked in PBS containing 0.1% BSA, 0.02%  
3 sodium azide and 1% goat serum for one hour at room temperature. Cells were immuno-  
4 stained in blocking buffer containing antibodies for 16h at 4°C. Secondary fluorochrome-  
5 conjugated antibodies (AlexaFluor 488 goat anti-mouse, AlexaFluor 488 goat anti-  
6 rabbit, AlexaFluor 568 goat anti-mouse, or AlexaFluor 568 goat anti-rabbit (Molecular  
7 Probes-Invitrogen) were added for 1h at room temperature. Coverslips were washed and  
8 mounted on glass slides using ProLong™ Diamond Antifade mountant media  
9 (Thermofisher) containing 4',6-diamidino-2-phenylindole (DAPI). Images were acquired  
10 with an inverted Axio Observer Z1 confocal spinning disk microscope (ZEISS). Images  
11 processing was performed using Zen elite blue edition or ImageJ software.

12

### 13 **Mitotic spindle preparation**

14 Mitotic spindles were prepared from mitosis synchronized cells essentially as described  
15 (Blower et al., 2007). Briefly, mitotic cells were synchronized in late G2 with RO-3306,  
16 released and incubated in the presence of taxol (100 µM) for 15 min to stabilize  
17 polymerized microtubule. Mitotic cells were collected by shake-off and cell extracts were  
18 diluted in lysis buffer (100 mM Pipes, pH 6.8, 1 mM MgSO<sub>4</sub>, and 2 mM EGTA, 4 µg/mL  
19 taxol, 2 µg/mL latrunculin B, 0.5% NP-40, 200 µg DNase 1, 1 U/mL micrococcal  
20 nuclease, 20 U/mL benzonate, protease and phosphatase inhibitor cocktails) and  
21 centrifuged for two min at 700 g. The microtubule pellet was dissolved in hypotonic buffer  
22 (1mM PIPES, 5 µg/mL taxol) and centrifuged again at 1 500 g for three minutes to obtain

1 purified mitotic spindle. Micrococcal nuclease was omitted when spindle-associated RNAs  
2 were purified.

3

#### 4 **Genomic DNA sequencing**

5 Genomic DNA was isolated (Bio Basic) and PCR-amplified using the Phusion  
6 polymerase (NEB) and specific primers flanking exon 6 of the *STAU1* gene (sense: 5'  
7 AGCCAAGTTTTTGTCTCAGCC 3'; antisense: 5' ACAGCTGTCAATGTGCCTTCT  
8 3'). PCR products were cloned into a pBluescript SK (+) vector (Stratagene). Ten clones  
9 were randomly chosen and sequenced (Genome Québec).

10

#### 11 **RNA extraction and quantitative real-time PCR (qRT-PCR)**

12 Total RNA was extracted using TRIZOL Reagent (Invitrogen) and reverse transcribed into  
13 cDNA using the RevertAid™ H Minus Reverse Transcriptase Thermo Scientific™ Kit  
14 (Thermo Fisher Scientific). RNA was resuspended in 20 µL water and digested with  
15 DNaseI using amplification grade AMPD1 kit (Sigma-Aldrich) prior to reverse  
16 transcription. Reverse transcription reactions were done with 1 µg RNA, MuLV RT  
17 enzyme and random hexamer (Thermo Fisher Scientific) according to the manufacturer  
18 protocol. Resulting cDNAs were qPCR amplified using the Roche LightCycler 480 SYBR  
19 Green I Master kit and the LightCycler® 480 instrument (Roche Applied Science). Cycling  
20 conditions were set at 95°C for 30 s, 60°C for 30 s and 72°C for 30 s, and 45 cycles. Sense  
21 and antisense primers were respectively: ASPM, 5'-  
22 GCACCTTTCTGCCATTCTTGAGG-3' and 5'-TGCTCCACTCTGGGCCATGT-3';  
23 MEX3D, 5'-CAGATGAGCGTGATCGGCA-3' and 5'-TGTTTGTCTTGGCCCGCAG-

1 3'; FAM101B, 5'-GGCTTTGTCCCCTGTCCTTT-3' and 5'-  
2 GCCTCTCGGAGTCGTA CTTG-3'; NAT8L, 5'-CGCTACTACTACAGCCGCAAG-3'  
3 and 5'-CACAATGCCCA C CACGTTGC-3; HPRT, 5'-GCTTTCCTTGGTCAGGCAGT-  
4 3' and 5'-CTTCGTGGGGTCCTTTTCACC-3'; RPL22, 5'-  
5 TGGTGACCATCGAAAGGAGCAAGA-3' and 5'-  
6 TTGCTGTTAGCAACTACGCGCAAC-3'; ETS-18S, 5'-  
7 CGCCGCGCTCTACCTTACC-3' and 5'-CGAGCGACCAAAGGAACCAT-3'; ITS1-  
8 5.8S, 5'-CTCGCCAAATCGACCTCGTA-3' and 5'-GCAAGTGCGTTCGAAGTGTC-  
9 3'.

10

## 11 **RNA-Seq and Differential gene expression analysis**

12 HCT116 were lysed in Trizol reagent (Life technologies) and RNA extracted. TURBO  
13 DNA-free™ Kit (Thermo Fisher Scientific) was used to eliminate DNA contamination  
14 and RNA was purified with RNeasy mini kit (Qiagen). Ribosomal RNA sequences were  
15 removed with the RiboMinus Eukaryote kit for RNA-Seq (ThermoFisher). RNA-  
16 Seq libraries were prepared using TruSeq stranded total RNA sample preparation kit  
17 (Illumina). Read quality was assessed using FastQC. No trimming was deemed necessary.  
18 Read alignment was executed using TopHat on the Human GRCh37 genomes from  
19 Ensembl (Trapnell et al., 2012). The GTF annotation file used during the alignment and  
20 for counting the number of reads aligned to each feature was also downloaded from  
21 Ensembl (release 75). Read count was obtained with featureCounts (Liao et al., 2014).  
22 Normalized count values (FPKM) and differential expression was computed with DESeq2  
23 (Anders and Huber, 2010). Gene biotypes and additional information were obtained via the

1 biomaRt R library (Durinck et al., 2009). All correlations and analysis were performed  
2 using R. The data discussed in this publication have been deposited in NCBI's Gene  
3 Expression Omnibus (Edgar et al., 2002) and are accessible through GEO Series accession  
4 number GSE138441 (<https://www.ncbi.nlm.nih.gov/geo/query/acc.cgi?acc=GSE138441>).  
5

## 1 **ACKNOWLEDGMENTS**

2 We thank Louise Cournoyer in the cell culture facility in the Département de biochimie et  
3 médecine moléculaire. We thank the molecular biology and functional genomics core  
4 facilities (Odile Neyret, Alexis Blanchet-Cohen) at the Institut de Recherches Cliniques de  
5 Montreal (IRCM) and the gene expression analysis core facilities at Genome Quebec  
6 Innovation Centre (McGill University) for transcriptomics approaches.

7

1 **COMPITING INTEREST**

2 No competing interests declared.

3

## 1 **FUNDING**

2 This work was supported by a grant from the Canadian Institute for Health Research

3 [MOP-229979 to LDG]; and the Bristol-Myers-Squibb chair in molecular biology to LDG.

4

**1 DATA AVAILABILITY**

2 Supplemental data are available at NAR online.

3



## 1 REFERENCES

2

3 Alliegro, M. C., and Alliegro, M. A. (2013). Localization of rRNA transcribed spacer  
4 domains in the nucleolus and maternal procentrioles of surf clam (*Spisula*)  
5 oocytes. *RNA biology* **10**, 391-396.

6 Anders, S., and Huber, W. (2010). Differential expression analysis for sequence count  
7 data. *Genome biology* **11**, R106.

8 Aviner, R., Geiger, T., and Elroy-Stein, O. (2013). Novel proteomic approach (PUNCH-P)  
9 reveals cell cycle-specific fluctuations in mRNA translation. *Genes & development*  
10 **27**, 1834-1844.

11 Belanger, G., Stocksley, M. A., Vandromme, M., Schaeffer, L., Furic, L., DesGroseillers, L.,  
12 and Jasmin, B. J. (2003). Localization of the RNA-binding proteins Staufen1 and  
13 Staufen2 at the mammalian neuromuscular junction. *Journal of neurochemistry*  
14 **86**, 669-677.

15 Blower, M. D., Feric, E., Weis, K., and Heald, R. (2007). Genome-wide analysis  
16 demonstrates conserved localization of messenger RNAs to mitotic  
17 microtubules. *The Journal of cell biology* **179**, 1365-1373.

18 Bonner, M. K., Poole, D. S., Xu, T., Sarkeshik, A., Yates, J. R., 3rd, and Skop, A. R. (2011).  
19 Mitotic spindle proteomics in Chinese hamster ovary cells. *PLoS one* **6**, e20489.

20 Boulay, K., Ghram, M., Viranaicken, W., Trepanier, V., Mollet, S., Frechina, C., and  
21 DesGroseillers, L. (2014). Cell cycle-dependent regulation of the RNA-binding  
22 protein Staufen1. *Nucleic acids research* **42**, 7867-7883.

23 Cao, Y., Du, J., Chen, D., Wang, Q., Zhang, N., Liu, X., Liu, X., Weng, J., Liang, Y., and Ma,  
24 W. (2016). RNA-binding protein Stau2 is important for spindle integrity and  
25 meiosis progression in mouse oocytes. *Cell cycle (Georgetown, Tex)* **15**, 2608-  
26 2618.

27 Carron, C., Balor, S., Delavoie, F., Plisson-Chastang, C., Faubladiere, M., Gleizes, P. E., and  
28 O'Donohue, M. F. (2012). Post-mitotic dynamics of pre-nucleolar bodies is driven  
29 by pre-rRNA processing. *Journal of cell science* **125**, 4532-4542.

- 1 Chao, J. A., Yoon, Y. J., and Singer, R. H. (2012). Imaging translation in single cells using  
2 fluorescent microscopy. *Cold Spring Harb Perspect Biol* **4**.
- 3 Chatel-Chaix, L., Boulay, K., Mouland, A. J., and Desgroseillers, L. (2008). The host  
4 protein Staufen1 interacts with the Pr55Gag zinc fingers and regulates HIV-1  
5 assembly via its N-terminus. *Retrovirology* **5**, 41.
- 6 Cho, H., Kim, K. M., Han, S., Choe, J., Park, S. G., Choi, S. S., and Kim, Y. K. (2012).  
7 Staufen1-mediated mRNA decay functions in adipogenesis. *Molecular cell* **46**,  
8 495-506.
- 9 Cummins, J. E., Blomquist, J. C., and Rusch, H. P. (1966). Anaphase delay after inhibition  
10 of protein synthesis between late prophase and prometaphase. *Science* **154**,  
11 1343-1344.
- 12 Damas, N. D., Marcatti, M., Come, C., Christensen, L. L., Nielsen, M. M., Baumgartner, R.,  
13 Gylling, H. M., Maglieri, G., Rundsten, C. F., Seemann, S. E., et al. (2016). SNHG5  
14 promotes colorectal cancer cell survival by counteracting STAU1-mediated  
15 mRNA destabilization. *Nat Commun* **7**, 13875.
- 16 de Lucas, S., Oliveros, J. C., Chagoyen, M., and Ortin, J. (2014). Functional signature for  
17 the recognition of specific target mRNAs by human Staufen1 protein. *Nucleic  
18 acids research* **42**, 4516-4526.
- 19 Dionisio-Vicuna, M. N., Gutierrez-Lopez, T. Y., Adame-Garcia, S. R., Vazquez-Prado, J.,  
20 and Reyes-Cruz, G. (2018). VPS28, an ESCRT-I protein, regulates mitotic spindle  
21 organization via Gbetagamma, EG5 and TPX2. *Biochim Biophys Acta Mol Cell Res*  
22 **1865**, 1012-1022.
- 23 Duchaine, T., Wang, H. J., Luo, M., Steinberg, S. V., Nabi, I. R., and DesGroseillers, L.  
24 (2000). A novel murine Staufen isoform modulates the RNA content of Staufen  
25 complexes. *Molecular and cellular biology* **20**, 5592-5601.
- 26 Duchaine, T. F., Hemraj, I., Furic, L., Deitinghoff, A., Kiebler, M. A., and DesGroseillers, L.  
27 (2002). Staufen2 isoforms localize to the somatodendritic domain of neurons  
28 and interact with different organelles. *Journal of cell science* **115**, 3285-3295.

- 1 Dugre-Brisson, S., Elvira, G., Boulay, K., Chatel-Chaix, L., Mouland, A. J., and  
2 DesGroseillers, L. (2005). Interaction of Staufen1 with the 5' end of mRNA  
3 facilitates translation of these RNAs. *Nucleic acids research* **33**, 4797-4812.
- 4 Dundr, M., Misteli, T., and Olson, M. O. (2000). The dynamics of postmitotic reassembly  
5 of the nucleolus. *The Journal of cell biology* **150**, 433-446.
- 6 Durinck, S., Spellman, P. T., Birney, E., and Huber, W. (2009). Mapping identifiers for the  
7 integration of genomic datasets with the R/Bioconductor package biomaRt.  
8 *Nature Protocols* **4**, 1184-1191.
- 9 Edgar, R., Domrachev, M., and Lash, A. E. (2002). Gene Expression Omnibus: NCBI gene  
10 expression and hybridization array data repository. *Nucleic acids research* **30**,  
11 207-210.
- 12 Elbarbary, R. A., Li, W., Tian, B., and Maquat, L. E. (2013). STAU1 binding 3' UTR IRAlus  
13 complements nuclear retention to protect cells from PKR-mediated translational  
14 shutdown. *Genes & development* **27**, 1495-1510.
- 15 Eliscovich, C., Peset, I., Vernos, I., and Mendez, R. (2008). Spindle-localized CPE-  
16 mediated translation controls meiotic chromosome segregation. *Nature cell*  
17 *biology* **10**, 858-865.
- 18 Ferrandon, D., Elphick, L., Nusslein-Volhard, C., and St Johnston, D. (1994). Staufen  
19 protein associates with the 3'UTR of bicoid mRNA to form particles that move in  
20 a microtubule-dependent manner. *Cell* **79**, 1221-1232.
- 21 Furic, L., Maher-Laporte, M., and DesGroseillers, L. (2008). A genome-wide approach  
22 identifies distinct but overlapping subsets of cellular mRNAs associated with  
23 Staufen1- and Staufen2-containing ribonucleoprotein complexes. *RNA (New*  
24 *York, N.Y)* **14**, 324-335.
- 25 Gautrey, H., McConnell, J., Lako, M., Hall, J., and Hesketh, J. (2008). Staufen1 is  
26 expressed in preimplantation mouse embryos and is required for embryonic  
27 stem cell differentiation. *Biochimica et biophysica acta* **1783**, 1935-1942.
- 28 Goetze, B., Tuebing, F., Xie, Y., Dorostkar, M. M., Thomas, S., Pehl, U., Boehm, S.,  
29 Macchi, P., and Kiebler, M. A. (2006). The brain-specific double-stranded RNA-

- 1 binding protein Staufen2 is required for dendritic spine morphogenesis. *The*  
2 *Journal of cell biology* **172**, 221-231.
- 3 Gong, C., Kim, Y. K., Woeller, C. F., Tang, Y., and Maquat, L. E. (2009). SMD and NMD are  
4 competitive pathways that contribute to myogenesis: effects on PAX3 and  
5 myogenin mRNAs. *Genes & development* **23**, 54-66.
- 6 Groisman, I., Huang, Y. S., Mendez, R., Cao, Q., Theurkauf, W., and Richter, J. D. (2000).  
7 CPEB, maskin, and cyclin B1 mRNA at the mitotic apparatus: implications for local  
8 translational control of cell division. *Cell* **103**, 435-447.
- 9 Heber, S., Gaspar, I., Tants, J. N., Gunther, J., Moya, S. M. F., Janowski, R., Ephrussi, A.,  
10 Sattler, M., and Niessing, D. (2019). Staufen2-mediated RNA recognition and  
11 localization requires combinatorial action of multiple domains. *Nat Commun* **10**,  
12 1659.
- 13 Hernandez-Verdun, D. (2011). Assembly and disassembly of the nucleolus during the cell  
14 cycle. *Nucleus* **2**, 189-194.
- 15 Hornbeck, P. V., Zhang, B., Murray, B., Kornhauser, J. M., Latham, V., and Skrzypek, E.  
16 (2015). PhosphoSitePlus, 2014: mutations, PTMs and recalibrations. *Nucleic acids*  
17 *research* **43**, D512-520.
- 18 Hussain, S., Benavente, S. B., Nascimento, E., Dragoni, I., Kurowski, A., Gillich, A.,  
19 Humphreys, P., and Frye, M. (2009). The nucleolar RNA methyltransferase Misu  
20 (NSun2) is required for mitotic spindle stability. *The Journal of cell biology* **186**,  
21 27-40.
- 22 Jeong, K., Ryu, I., Park, J., Hwang, H. J., Ha, H., Park, Y., Oh, S. T., and Kim, Y. K. (2019).  
23 Staufen1 and UPF1 exert opposite actions on the replacement of the nuclear  
24 cap-binding complex by eIF4E at the 5' end of mRNAs. *Nucleic acids research* **47**,  
25 9313-9328.
- 26 Jinek, M., Chylinski, K., Fonfara, I., Hauer, M., Doudna, J. A., and Charpentier, E. (2012).  
27 A programmable dual-RNA-guided DNA endonuclease in adaptive bacterial  
28 immunity. *Science (New York, N.Y)* **337**, 816-821.

- 1 Keene, J. D. (2007). RNA regulons: coordination of post-transcriptional events. *Nature*  
2 *reviews* **8**, 533-543.
- 3 Khatua, S., Peterson, K. M., Brown, K. M., Lawlor, C., Santi, M. R., LaFleur, B., Dressman,  
4 D., Stephan, D. A., and MacDonald, T. J. (2003). Overexpression of the  
5 EGFR/FKBP12/HIF-2alpha pathway identified in childhood astrocytomas by  
6 angiogenesis gene profiling. *Cancer research* **63**, 1865-1870.
- 7 Kiebler, M. A., Hemraj, I., Verkade, P., Kohrmann, M., Fortes, P., Marion, R. M., Ortin, J.,  
8 and Dotti, C. G. (1999). The mammalian staufen protein localizes to the  
9 somatodendritic domain of cultured hippocampal neurons: implications for its  
10 involvement in mRNA transport. *J Neurosci* **19**, 288-297.
- 11 Kim, Y. K., Furic, L., DesGroseillers, L., and Maquat, L. E. (2005). Mammalian Staufen1  
12 recruits Upf1 to specific mRNA 3'UTRs so as to elicit mRNA decay. *Cell* **120**, 195-  
13 208.
- 14 Kim, Y. K., Furic, L., Parisien, M., Major, F., DesGroseillers, L., and Maquat, L. E. (2007).  
15 Staufen1 regulates diverse classes of mammalian transcripts. *The EMBO journal*  
16 **26**, 2670-2681.
- 17 Kingsley, E. P., Chan, X. Y., Duan, Y., and Lambert, J. D. (2007). Widespread RNA  
18 segregation in a spiralian embryo. *Evol Dev* **9**, 527-539.
- 19 Kretz, M. (2013). TINCR, staufen1, and cellular differentiation. *RNA biology* **10**, 1597-  
20 1601.
- 21 Laver, J. D., Li, X., Ancevicus, K., Westwood, J. T., Smibert, C. A., Morris, Q. D., and  
22 Lipshitz, H. D. (2013). Genome-wide analysis of Staufen-associated mRNAs  
23 identifies secondary structures that confer target specificity. *Nucleic acids*  
24 *research* **41**, 9438-9460.
- 25 Lebeau, G., Maher-Laporte, M., Topolnik, L., Laurent, C. E., Sossin, W., Desgroseillers, L.,  
26 and Lacaille, J. C. (2008). Staufen1 regulation of protein synthesis-dependent  
27 long-term potentiation and synaptic function in hippocampal pyramidal cells.  
28 *Molecular and cellular biology* **28**, 2896-2907.

- 1 Lebeau, G., Miller, L. C., Tartas, M., McAdam, R., Laplante, I., Badeaux, F., DesGroseillers,  
2 L., Sossin, W. S., and Lacaille, J. C. (2011). Staufen 2 regulates mGluR long-term  
3 depression and Map1b mRNA distribution in hippocampal neurons. *Learning &*  
4 *memory (Cold Spring Harbor, N.Y)* **18**, 314-326.
- 5 LeGendre, J. B., Campbell, Z. T., Kroll-Conner, P., Anderson, P., Kimble, J., and Wickens,  
6 M. (2013). RNA targets and specificity of Staufen, a double-stranded RNA-  
7 binding protein in *Caenorhabditis elegans*. *The Journal of biological chemistry*  
8 **288**, 2532-2545.
- 9 Liao, Y., Smyth, G. K., and Shi, W. (2014). featureCounts: an efficient general purpose  
10 program for assigning sequence reads to genomic features. *Bioinformatics* **30**,  
11 923-930.
- 12 Liu, Z., Chen, Z., Fan, R., Jiang, B., Chen, X., Chen, Q., Nie, F., Lu, K., and Sun, M. (2017).  
13 Over-expressed long noncoding RNA HOXA11-AS promotes cell cycle progression  
14 and metastasis in gastric cancer. *Mol Cancer* **16**, 82.
- 15 Luo, M., Duchaine, T. F., and DesGroseillers, L. (2002). Molecular mapping of the  
16 determinants involved in human Staufen-ribosome association. *The Biochemical*  
17 *journal* **365**, 817-824.
- 18 Marion, R. M., Fortes, P., Beloso, A., Dotti, C., and Ortin, J. (1999). A human sequence  
19 homologue of Staufen is an RNA-binding protein that is associated with  
20 polysomes and localizes to the rough endoplasmic reticulum. *Molecular and*  
21 *cellular biology* **19**, 2212-2219.
- 22 Martel, C., Dugre-Brisson, S., Boulay, K., Breton, B., Lapointe, G., Armando, S., Trepanier,  
23 V., Duchaine, T., Bouvier, M., and Desgroseillers, L. (2010). Multimerization of  
24 Staufen1 in live cells. *RNA (New York, N.Y)* **16**, 585-597.
- 25 Martel, C., Macchi, P., Furic, L., Kiebler, M. A., and Desgroseillers, L. (2006). Staufen1 is  
26 imported into the nucleolus via a bipartite nuclear localization signal and several  
27 modulatory determinants. *The Biochemical journal* **393**, 245-254.
- 28 Mayya, V. K., and Duchaine, T. F. (2019). Ciphers and Executioners: How 3'-Untranslated  
29 Regions Determine the Fate of Messenger RNAs. *Front Genet* **10**, 6.

- 1 Micklem, D. R., Adams, J., Grunert, S., and St Johnston, D. (2000). Distinct roles of two  
2 conserved Staufen domains in oskar mRNA localization and translation. *The*  
3 *EMBO journal* **19**, 1366-1377.
- 4 Morita, E., Colf, L. A., Karren, M. A., Sandrin, V., Rodesch, C. K., and Sundquist, W. I.  
5 (2010). Human ESCRT-III and VPS4 proteins are required for centrosome and  
6 spindle maintenance. *Proceedings of the National Academy of Sciences of the*  
7 *United States of America* **107**, 12889-12894.
- 8 Neriec, N., and Percipalle, P. (2018). Sorting mRNA Molecules for Cytoplasmic Transport  
9 and Localization. *Front Genet* **9**, 510.
- 10 Park, J. E., Yi, H., Kim, Y., Chang, H., and Kim, V. N. (2016). Regulation of Poly(A) Tail and  
11 Translation during the Somatic Cell Cycle. *Molecular cell* **62**, 462-471.
- 12 Petsalaki, E., Dandoulaki, M., and Zachos, G. (2018). The ESCRT protein Chmp4c  
13 regulates mitotic spindle checkpoint signaling. *The Journal of cell biology* **217**,  
14 861-876.
- 15 Petsalaki, E., and Zachos, G. (2018). Novel ESCRT functions at kinetochores. *Aging*  
16 *(Albany NY)* **10**, 299-300.
- 17 Rao, S., Hassine, S., Monette, A., Amorim, R., DesGroseillers, L., and Mouland, A. J.  
18 (2019). HIV-1 requires Staufen1 to dissociate stress granules and to produce  
19 infectious viral particles. *RNA (New York, N.Y)* **25**, 727-736.
- 20 Rao, S. R., Flores-Rodriguez, N., Page, S. L., Wong, C., Robinson, P. J., and Chircop, M.  
21 (2016). The Clathrin-dependent Spindle Proteome. *Molecular & cellular*  
22 *proteomics : MCP* **15**, 2537-2553.
- 23 Ravel-Chapuis, A., Belanger, G., Yadava, R. S., Mahadevan, M. S., DesGroseillers, L., Cote,  
24 J., and Jasmin, B. J. (2012). The RNA-binding protein Staufen1 is increased in  
25 DM1 skeletal muscle and promotes alternative pre-mRNA splicing. *The Journal of*  
26 *cell biology* **196**, 699-712.
- 27 Ricci, E. P., Kucukural, A., Cenik, C., Mercier, B. C., Singh, G., Heyer, E. E., Ashar-Patel, A.,  
28 Peng, L., and Moore, M. J. (2014). Staufen1 senses overall transcript secondary

- 1 structure to regulate translation. *Nature structural & molecular biology* **21**, 26-  
2 35.
- 3 Sakurai, M., Shiromoto, Y., Ota, H., Song, C. Z., Kossenkov, A. V., Wickramasinghe, J.,  
4 Showe, L. C., Skordalakes, E., Tang, H. Y., Speicher, D. W., et al. (2017). ADAR1  
5 controls apoptosis of stressed cells by inhibiting Staufen1-mediated mRNA  
6 decay. *Nature structural & molecular biology* **24**, 534-543.
- 7 Sepulveda, G., Antkowiak, M., Brust-Mascher, I., Mahe, K., Ou, T., Castro, N. M.,  
8 Christensen, L. N., Cheung, L., Jiang, X., Yoon, D., et al. (2018). Co-translational  
9 protein targeting facilitates centrosomal recruitment of PCNT during centrosome  
10 maturation in vertebrates. *Elife* **7**.
- 11 Sharp, J. A., Plant, J. J., Ohsumi, T. K., Borowsky, M., and Blower, M. D. (2011).  
12 Functional analysis of the microtubule-interacting transcriptome. *Molecular*  
13 *biology of the cell* **22**, 4312-4323.
- 14 Shishova, K. V., Zharskaya, C. O., and Zatssepina, C. O. (2011). The Fate of the Nucleolus  
15 during Mitosis: Comparative Analysis of Localization of Some Forms of Pre-rRNA  
16 by Fluorescent in Situ Hybridization in NIH/3T3 Mouse Fibroblasts. *Acta Naturae*  
17 **3**, 100-106.
- 18 Sirri, V., Jourdan, N., Hernandez-Verdun, D., and Roussel, P. (2016). Sharing of mitotic  
19 pre-ribosomal particles between daughter cells. *Journal of cell science* **129**, 1592-  
20 1604.
- 21 Stumpf, C. R., Moreno, M. V., Olshen, A. B., Taylor, B. S., and Ruggero, D. (2013). The  
22 Translational Landscape of the Mammalian Cell Cycle. *Molecular cell* **52**, 574-  
23 582.
- 24 Sugimoto, Y., Vigilante, A., Darbo, E., Zirra, A., Militti, C., D'Ambrogio, A., Luscombe, N.  
25 M., and Ule, J. (2015). hiCLIP reveals the in vivo atlas of mRNA secondary  
26 structures recognized by Staufen 1. *Nature* **519**, 491-494.
- 27 Suter, B. (2018). RNA localization and transport. *Biochim Biophys Acta Gene Regul Mech*  
28 **1861**, 938-951.



- 1 Tanenbaum, M. E., Stern-Ginossar, N., Weissman, J. S., and Vale, R. D. (2015). Regulation  
2 of mRNA translation during mitosis. *Elife* **4**.
- 3 Thomas, M. G., Tosar, L. J., Desbats, M. A., Leishman, C. C., and Boccaccio, G. L. (2009).  
4 Mammalian Staufen 1 is recruited to stress granules and impairs their assembly.  
5 *Journal of cell science* **122**, 563-573.
- 6 Trapnell, C., Roberts, A., Goff, L., Pertea, G., Kim, D., Kelley, D. R., Pimentel, H., Salzberg,  
7 S. L., Rinn, J. L., and Pachter, L. (2012). Differential gene and transcript  
8 expression analysis of RNA-seq experiments with TopHat and Cufflinks. *Nature*  
9 *Protocols* **7**, 562-578.
- 10 Tripathi, S., Pohl, M. O., Zhou, Y. Y., Rodriguez-Frandsen, A., Wang, G. J., Stein, D. A.,  
11 Moulton, H. M., DeJesus, P., Che, J. W., Mulder, L. C. F., et al. (2015). Meta- and  
12 Orthogonal Integration of Influenza "OMICs" Data Defines a Role for UBR4 in  
13 Virus Budding. *Cell Host Microbe* **18**, 723-735.
- 14 Van Nostrand, E. L., Pratt, G. A., Yee, B. A., Wheeler, E., Blue, S. M., Mueller, J., Park, S.  
15 S., Garcia, K. E., Gelboin-Burkhart, C., Nguyen, T. B., et al. (2020). Principles of  
16 RNA processing from analysis of enhanced CLIP maps for 150 RNA binding  
17 proteins. *bioRxiv* **807008**.
- 18 Vessey, J. P., Macchi, P., Stein, J. M., Mikl, M., Hawker, K. N., Vogelsang, P., Wieczorek,  
19 K., Vendra, G., Riefler, J., Tubing, F., et al. (2008). A loss of function allele for  
20 murine Staufen1 leads to impairment of dendritic Staufen1-RNP delivery and  
21 dendritic spine morphogenesis. *Proceedings of the National Academy of Sciences*  
22 *of the United States of America* **105**, 16374-16379.
- 23 Vietri, M., Schink, K. O., Campsteijn, C., Wegner, C. S., Schultz, S. W., Christ, L., Thoresen,  
24 S. B., Brech, A., Raiborg, C., and Stenmark, H. (2015). Spastin and ESCRT-III  
25 coordinate mitotic spindle disassembly and nuclear envelope sealing. *Nature*  
26 **522**, 231-235.
- 27 Wan, D., Gong, Y., Qin, W., Zhang, P., Li, J., Wei, L., Zhou, X., Li, H., Qiu, X., Zhong, F., et  
28 al. (2004). Large-scale cDNA transfection screening for genes related to cancer

1            development and progression. *Proceedings of the National Academy of Sciences*  
2            *of the United States of America* **101**, 15724-15729.

3    Wickham, L., Duchaine, T., Luo, M., Nabi, I. R., and DesGroseillers, L. (1999). Mammalian  
4            staufen is a double-stranded-RNA- and tubulin-binding protein which localizes to  
5            the rough endoplasmic reticulum. *Molecular and cellular biology* **19**, 2220-2230.

6    Wilker, E. W., van Vugt, M. A., Artim, S. A., Huang, P. H., Petersen, C. P., Reinhardt, H. C.,  
7            Feng, Y., Sharp, P. A., Sonenberg, N., White, F. M., et al. (2007). 14-3-3sigma  
8            controls mitotic translation to facilitate cytokinesis. *Nature* **446**, 329-332.

9    Xu, T. P., Liu, X. X., Xia, R., Yin, L., Kong, R., Chen, W. M., Huang, M. D., and Shu, Y. Q.  
10            (2015). SP1-induced upregulation of the long noncoding RNA TINCR regulates  
11            cell proliferation and apoptosis by affecting KLF2 mRNA stability in gastric  
12            cancer. *Oncogene* **34**, 5648-5661.

13    Xu, T. P., Wang, Y. F., Xiong, W. L., Ma, P., Wang, W. Y., Chen, W. M., Huang, M. D., Xia,  
14            R., Wang, R., Zhang, E. B., et al. (2017). E2F1 induces TINCR transcriptional  
15            activity and accelerates gastric cancer progression via activation of  
16            TINCR/STAU1/CDKN2B signaling axis. *Cell Death Dis* **8**, e2837.

17    Yamaguchi, Y., Oohinata, R., Naiki, T., and Irie, K. (2008). Stau1 negatively regulates  
18            myogenic differentiation in C2C12 cells. *Genes Cells* **13**, 583-592.

19

1  
2  
3  
4

**TABLE 1**

**Total number of individual transcripts and of transcripts per million (TPM) across RNA biotypes.**

| Biotype     | Number | TPM      |         |          |         |
|-------------|--------|----------|---------|----------|---------|
|             |        | MS-CR1.3 | MS-WT   | IN-CR1.3 | IN-WT   |
| lncRNA      | 2 549  | 177 538  | 132 034 | 224 053  | 256 876 |
| miRNA       | 711    | 137 876  | 313 748 | 10 511   | 10 185  |
| misc_RNA    | 395    | 71 640   | 58 060  | 219 190  | 237 103 |
| Prot-coding | 11 782 | 449 509  | 247 028 | 497 031  | 449 242 |
| pseudogene  | 1 545  | 16 440   | 10 274  | 11 315   | 10 531  |
| rRNA        | 19     | 64 205   | 170 341 | 8 024    | 8 372   |
| snoRNA      | 361    | 64 869   | 55 563  | 23 091   | 21 775  |
| snRNA       | 414    | 16 651   | 11 771  | 5 718    | 5 314   |
| tRNA        | 22     | 1 269    | 1 178   | 1 063    | 596     |
| RNA28S5     | 1      | 62 906   | 168 792 | 6 030    | 6 090   |
| mir3648     | 1      | 45 624   | 138 997 | 3 033    | 3 562   |
| mir3687     | 1      | 85 280   | 168 002 | 3 869    | 3 828   |

5  
6  
7  
8  
9  
10  
11  
12  
13

Number: number of individual RNA  
 TPM: transcripts per million  
 MS: mitotic spindle  
 IN: input (total mitotic cell extract)  
 CR1.3: STAU1-KO HCT116 cells (clone CR1.3)  
 WT: wild type HCT116 cells

## 1 **FIGURE LEGENDS**

2

3 **Figure 1. Localization of STAU1 on the mitotic spindle.** HCT116 cells were  
4 synchronized in late G2 with the CDK1 inhibitor RO-3306 and released from the block to  
5 reach mitosis. Mitotic spindle microtubules were stabilized by Taxol. Cells were  
6 solubilized with Triton X-100 before fixation to remove soluble material. **A)** Confocal  
7 images of cells stained with antibodies against STAU1 and  $\alpha$ -tubulin. DNA was stained  
8 with DAPI. Cells at different stages of mitosis are shown. This figure is representative of  
9 multiple experiments done by three different experimenters. STAU localization on spindle  
10 was observed in all mitotic cells. **B)** Left panel: Confocal images of cells stained with  
11 antibodies against STAU1 and  $\alpha$ -tubulin to visualize STAU1 and mitotic spindles. DNA  
12 was stained with DAPI. Right panels: 3D-analysis of the relative position of STAU1 and  
13  $\alpha$ -tubulin on microtubules shows co-localization of the proteins in space.

14

15 **Figure 2. Co-purification of STAU1 with mitotic spindle proteins.** **A)** Cell cycle  
16 distribution of unsynchronized (Asynchronous) and taxol-synchronized (Taxol) cells was  
17 determined by FACS analysis. ( $p$ -value  $\leq 0,05$ ;  $n = 3$ ). **B)** Western blot analysis of purified  
18 mitotic spindles (MS) using specific antibodies. Total input lysates (IN) from asynchronous  
19 (As) and taxol-synchronized (Taxol) cells were loaded as controls. This figure is  
20 representative of three independently performed experiments.

21

22 **Figure 3. Mapping of the molecular determinant involved in STAU1-spindle**  
23 **association.** STAU1-KO HCT116 cells were transfected with plasmids coding for HA<sub>3</sub>-

1 tagged STAU1 WT or deletion mutants ( $\Delta$ ) to map the molecular determinant involved in  
2 the binding of STAU1 to the mitotic spindle. **A)** Schematic representation of STAU1 WT  
3 and mutants. \*, point mutation that abolishes STAU1 RNA-binding activity. RBD: RNA-  
4 binding domain. TBD, tubulin-binding domain. White boxes, RNA-binding domains. Grey  
5 boxes, domains that do not bind RNA in vitro although they have the consensus sequence  
6 for RNA-binding. Black boxes, tubulin-binding domains. **B)** Cells were synchronized in  
7 mitosis with taxol. Proteins from the total cell extracts (IN) and from purified spindle  
8 preparations (MS) were analyzed by western blotting. Proteins were identified with  
9 specific antibodies as indicated. **C)** Quantification of STAU1 proteins on the mitotic  
10 spindle. The ratio of STAU1 amounts in the spindle preparations over that in the total  
11 mitotic cell extracts was calculated. The ratio obtained for STAU1 WT was arbitrary fixed  
12 to 1. These data are representative of two independently performed experiments that gave  
13 similar results.

14

15 **Figure 4. Fine mapping of the N-terminal determinant responsible for STAU1-spindle**  
16 **association. A, D)** Schematic representations of STAU1 deletion mutants (see legend of  
17 figure 3A for box codes). **B, E)** Proteins from total cell extracts (IN) and purified spindle  
18 preparations (MS) were analyzed by western blotting with specific antibodies. **C, F)**  
19 Quantification of the amounts of STAU1 proteins on the mitotic spindle. The ratio of  
20 STAU1 amounts in the spindle preparations over that in the cell extracts was calculated.  
21 The graphs represent the means  $\pm$  s.d. of three independently performed experiments. The  
22 ratio obtained for STAU1 WT was arbitrary fixed to 1. \*,  $p$ -value  $\leq 0.05$ ; \*\*\*,  $p$ -value  $\leq$   
23 0.001.

1 **Figure 5. Spindle-enriched transcriptome in HCT116 cells.** A) Histogram depicting the  
2 RNA biotype content, in transcripts per million (TPM), in total mitotic cell extracts (Total)  
3 and mitotic spindles (MS) from WT and STAU1-KO HCT116 cells. Biotypes accounting  
4 for less than 1% of the overall TPMs were grouped as “other”. B) Schematic  
5 representation of the RNA28S5 locus showing the 45S pre-rRNA. Arrows indicate the  
6 position of the oligonucleotides used for RT-qPCR shown in (C). The position of miRNAs  
7 and mature rRNAs is shown. C) RT-qPCR amplification of spindle-associated RNAs using  
8 oligonucleotides that recognized different parts of the 45S rRNA. The levels of enrichment  
9 in spindle preparations (MS) compared to cell extracts (IN) are shown. The graphs  
10 represent the mean and standard deviation of three independently performed experiments.  
11 HMBS, hydroxymethylbilane synthase; ETS, external transcribed spacer; ITS, internal  
12 transcribed spacer. D) Scatter plots of the relative distribution of Fragments Per Kilobase  
13 of transcript per Million mapped reads (FPKM) in mitotic spindles preparations (MS) vs  
14 cell extracts in WT HCT116 cells. Red, RNAs at least 2 fold more abundant ( $p$ -value  $\leq$   
15 0.05) in MS than in cell extracts. Blue, RNAs at least 2 fold less abundant ( $p$ -value  $\leq$  0.05)  
16 in MS than in cell extracts. E) Histogram of the frequency of genes in function of their  
17 enrichment in MS preparations vs cell extracts in WT cells. F) Relative amount of RNAs  
18 that are delocalized from the spindle in the absence of STAU1-KO cells. The percentage  
19 of the number of different individual RNA in each biotype (left) and the percentage of TPM  
20 in each biotype (right) are shown.

21

22 **Figure 6. Validation of RNA-Seq data by RT-qPCR.** WT and STAU1-KO HCT116 cells  
23 were synchronized in mitosis. Two STAU1-CRISPR-KO cell lines (CR1.3 and CR2.9)

1 generated with different RNA guides were used. RNAs in mitotic cell extracts (left) and in  
2 purified mitotic spindle preparations (right) were analyzed. RNAs were quantified by RT-  
3 qPCR with specific primer pairs. **A)** The contribution of STAU1 in pre-rRNA localization  
4 is shown. The graphs represent the mean and standard deviation of three independently  
5 performed experiments. \*,  $p$ -value  $\leq 0.05$ ; \*\*,  $p$ -value  $\leq 0.01$ ; \*\*\*,  $p$ -value  $\leq 0.001$ . **B)** The  
6 amount of mRNAs in cell extracts and in spindle preparations was expressed as the ratio  
7 of the amount of a specific gene over that of the negative controls HPRT+RPL22. The  
8 ratios obtained with RNAs in the spindle preparations were normalized to the ratio in the  
9 cell extracts in both STAU1-KO and WT cells. The ratio in WT cells was arbitrary fixed to  
10 1. Data represents the means and standard deviation of four independently performed  
11 experiments. *ASPM*, abnormal spindle microtubule assembly; *MEX3D*, mex-3 RNA-  
12 binding family member D; *FAM101B*, refilin B; *NAT8L*, N-acetyltransferase 8 like; *HPRT*,  
13 hypoxanthine guanine phosphoribosyl transferase; *RPL22*, ribosomal protein L22.

14

15 **Figure 7. Co-localization of STAU1 and the translation machinery on spindles.**

16 HCT116 cells were synchronized in late G<sub>2</sub> with the Cdk1 inhibitor RO-3306 and released  
17 from the block with fresh medium to reach mitosis. Cells were treated with Triton-X 100  
18 to remove soluble materials before fixation. **A)** Cells were stained with anti-S6 (RPS6) and  
19 anti-tubulin antibodies to localize ribosomes and the mitotic spindle, respectively. DNA  
20 was stained with DAPI. Line scan (right panel) analysis indicates co-localization of RPS6  
21 and tubulin on fiber tracks. The figure is representative of three independently performed  
22 experiments giving similar results in every cells. **B)** Cells were stained with anti-S6 (RPS6)  
23 and anti-STAU1 antibodies to localize ribosomes and STAU1, respectively. DNA was

1 stained with DAPI. Line scan (right panel) analysis shows overlapping peaks of RPS6 and  
2 STAU1 signals. Scale bars = 5  $\mu$ m. The figure is representative of three independently  
3 performed experiments giving similar results in every cells. C) Cells were stained with  
4 anti-tubulin and anti-STAU1 antibodies as well as with O-propargyl-puromycin (OP-Pur),  
5 a marker of active translation. DNA was stained with DAPI. Co-localization was quantified  
6 by line scan analysis (bottom). The figure is representative of five independently performed  
7 experiments giving similar results in every cells.

8

9

10



Figure 1

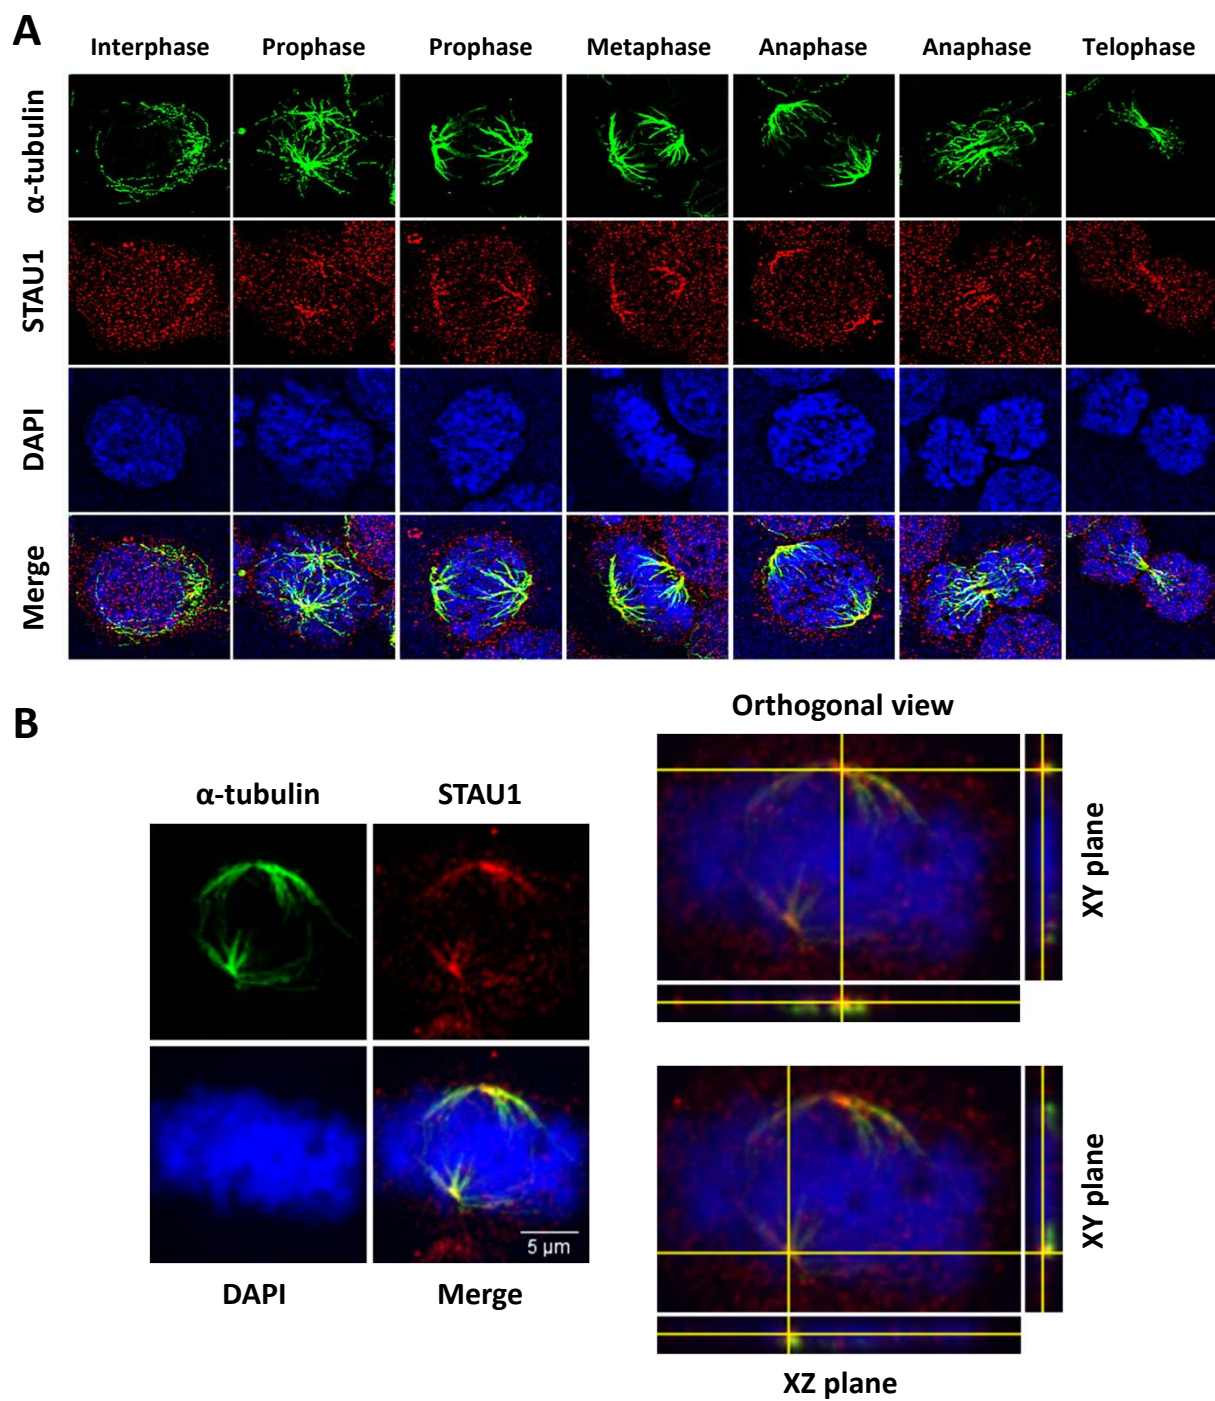

Figure 2

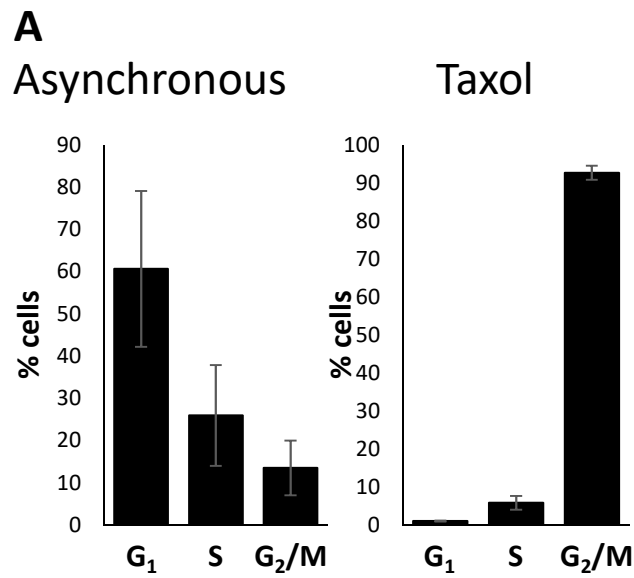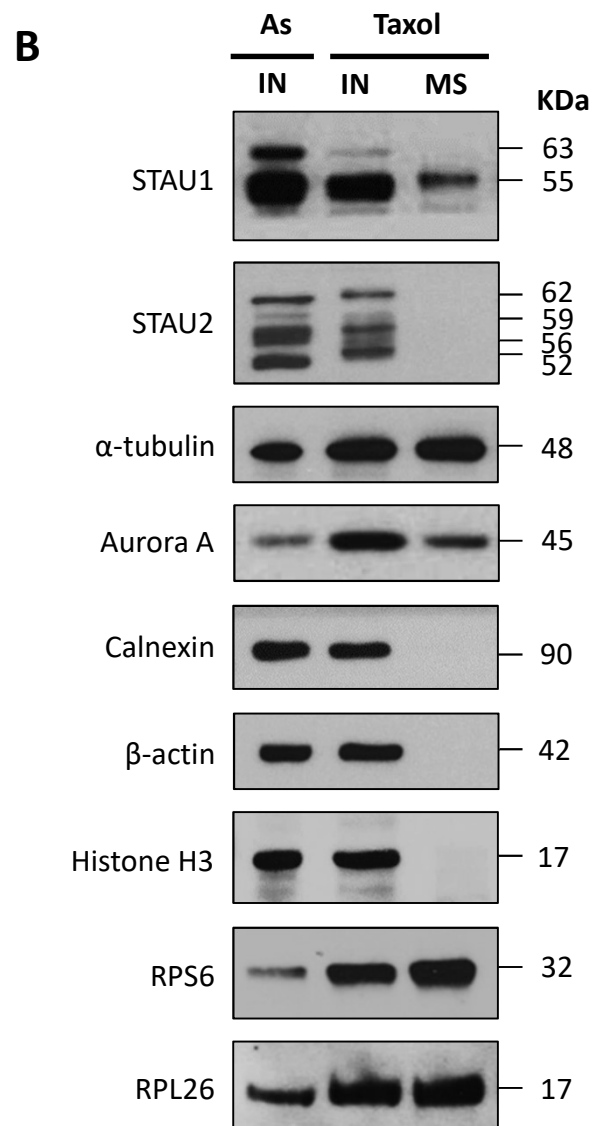

Figure 3

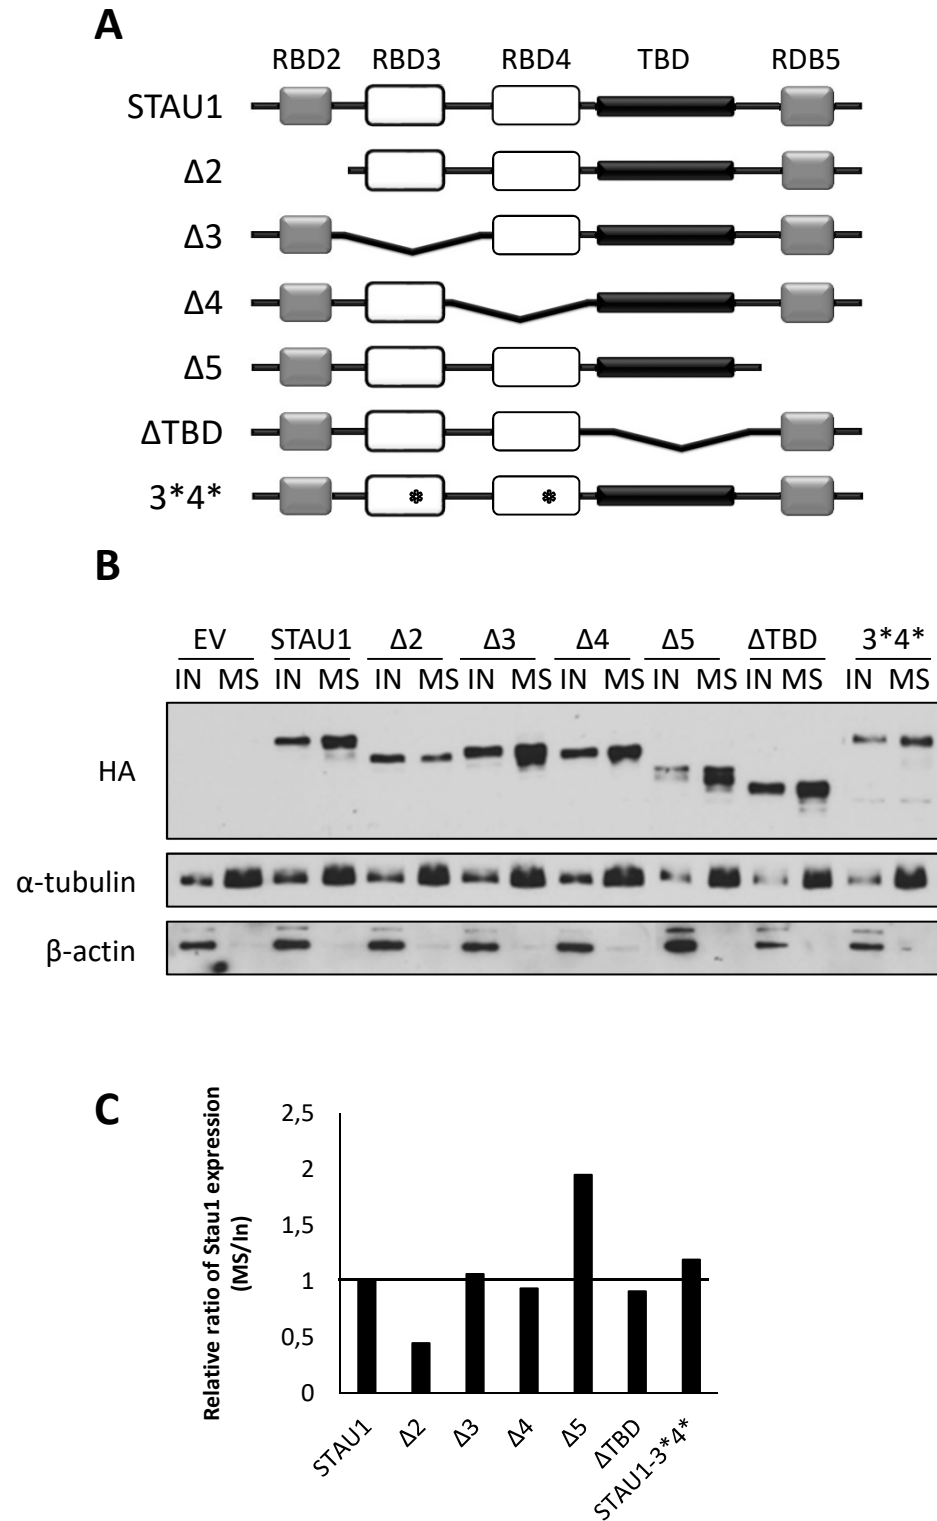

Figure 4

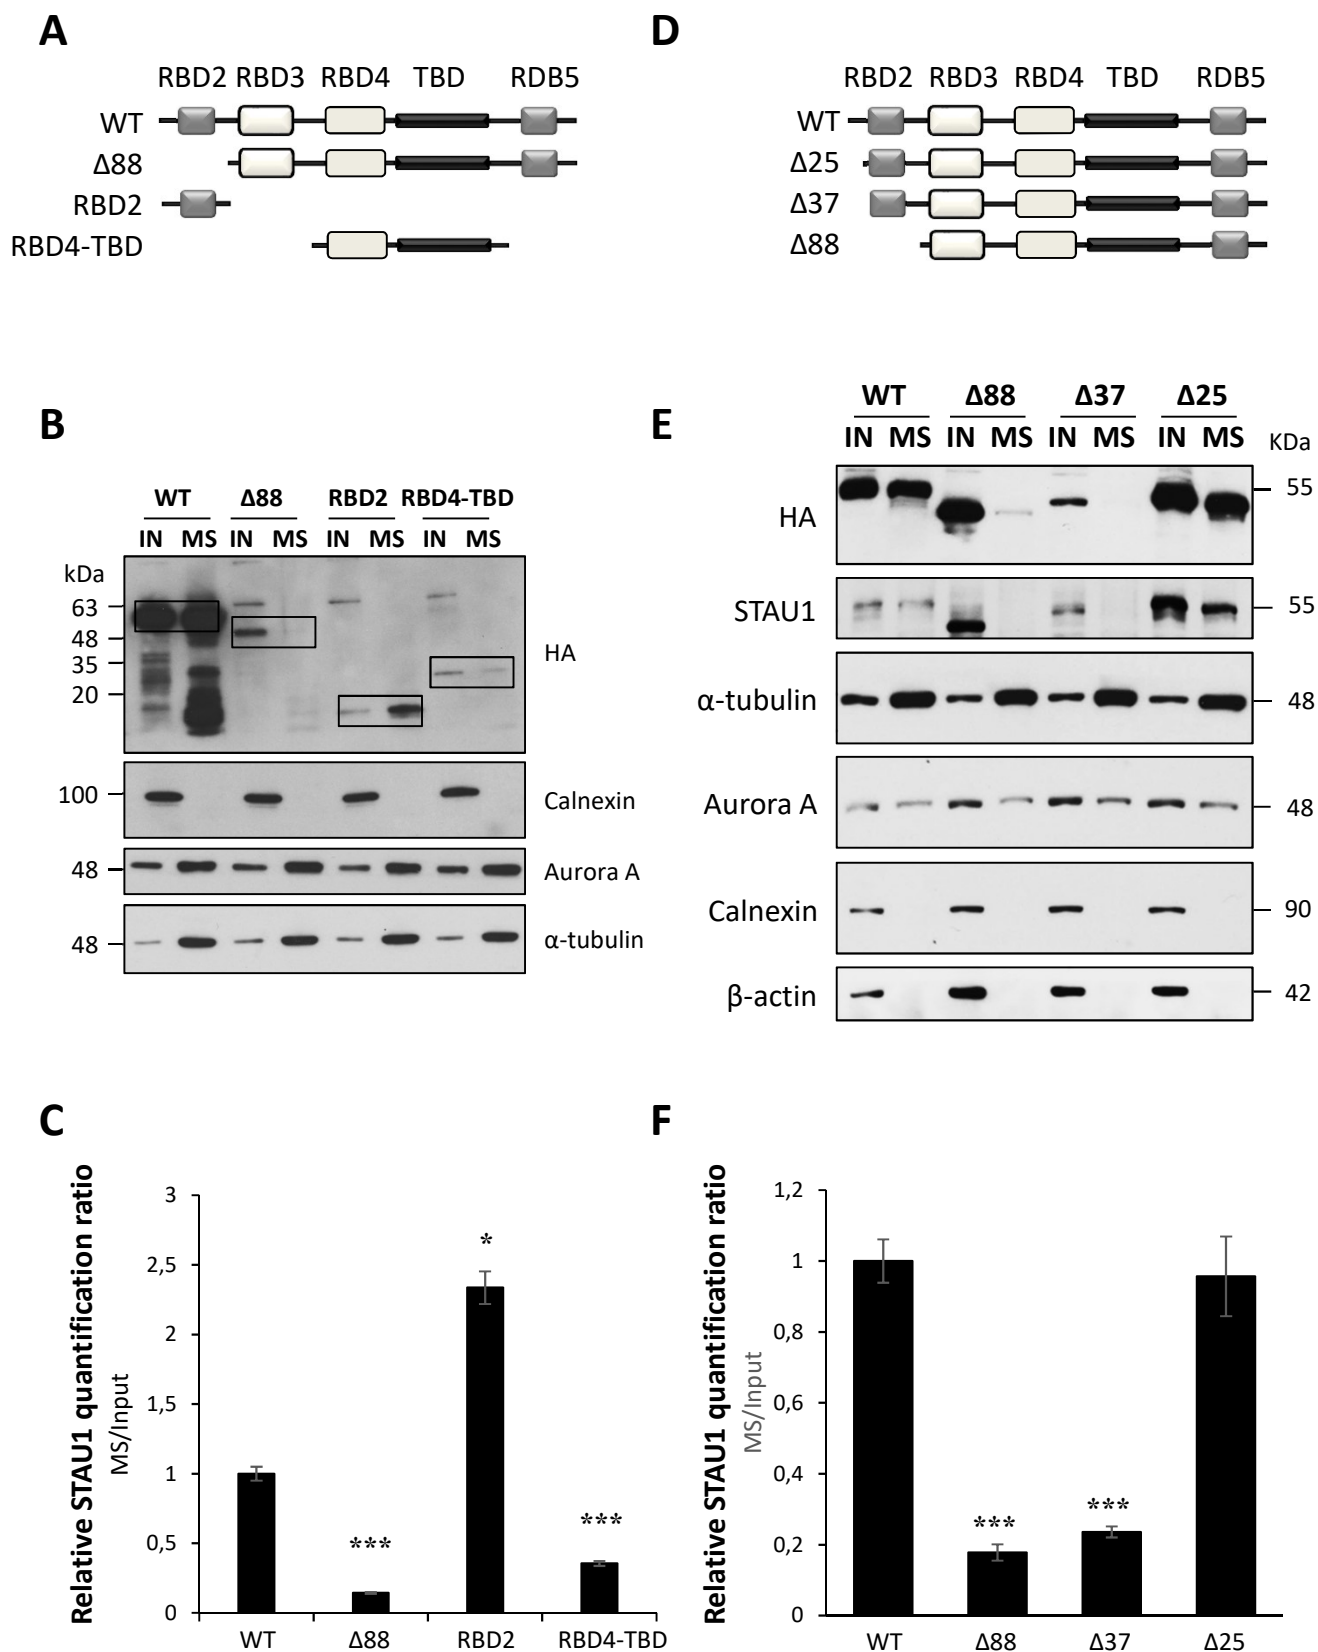

Figure 5

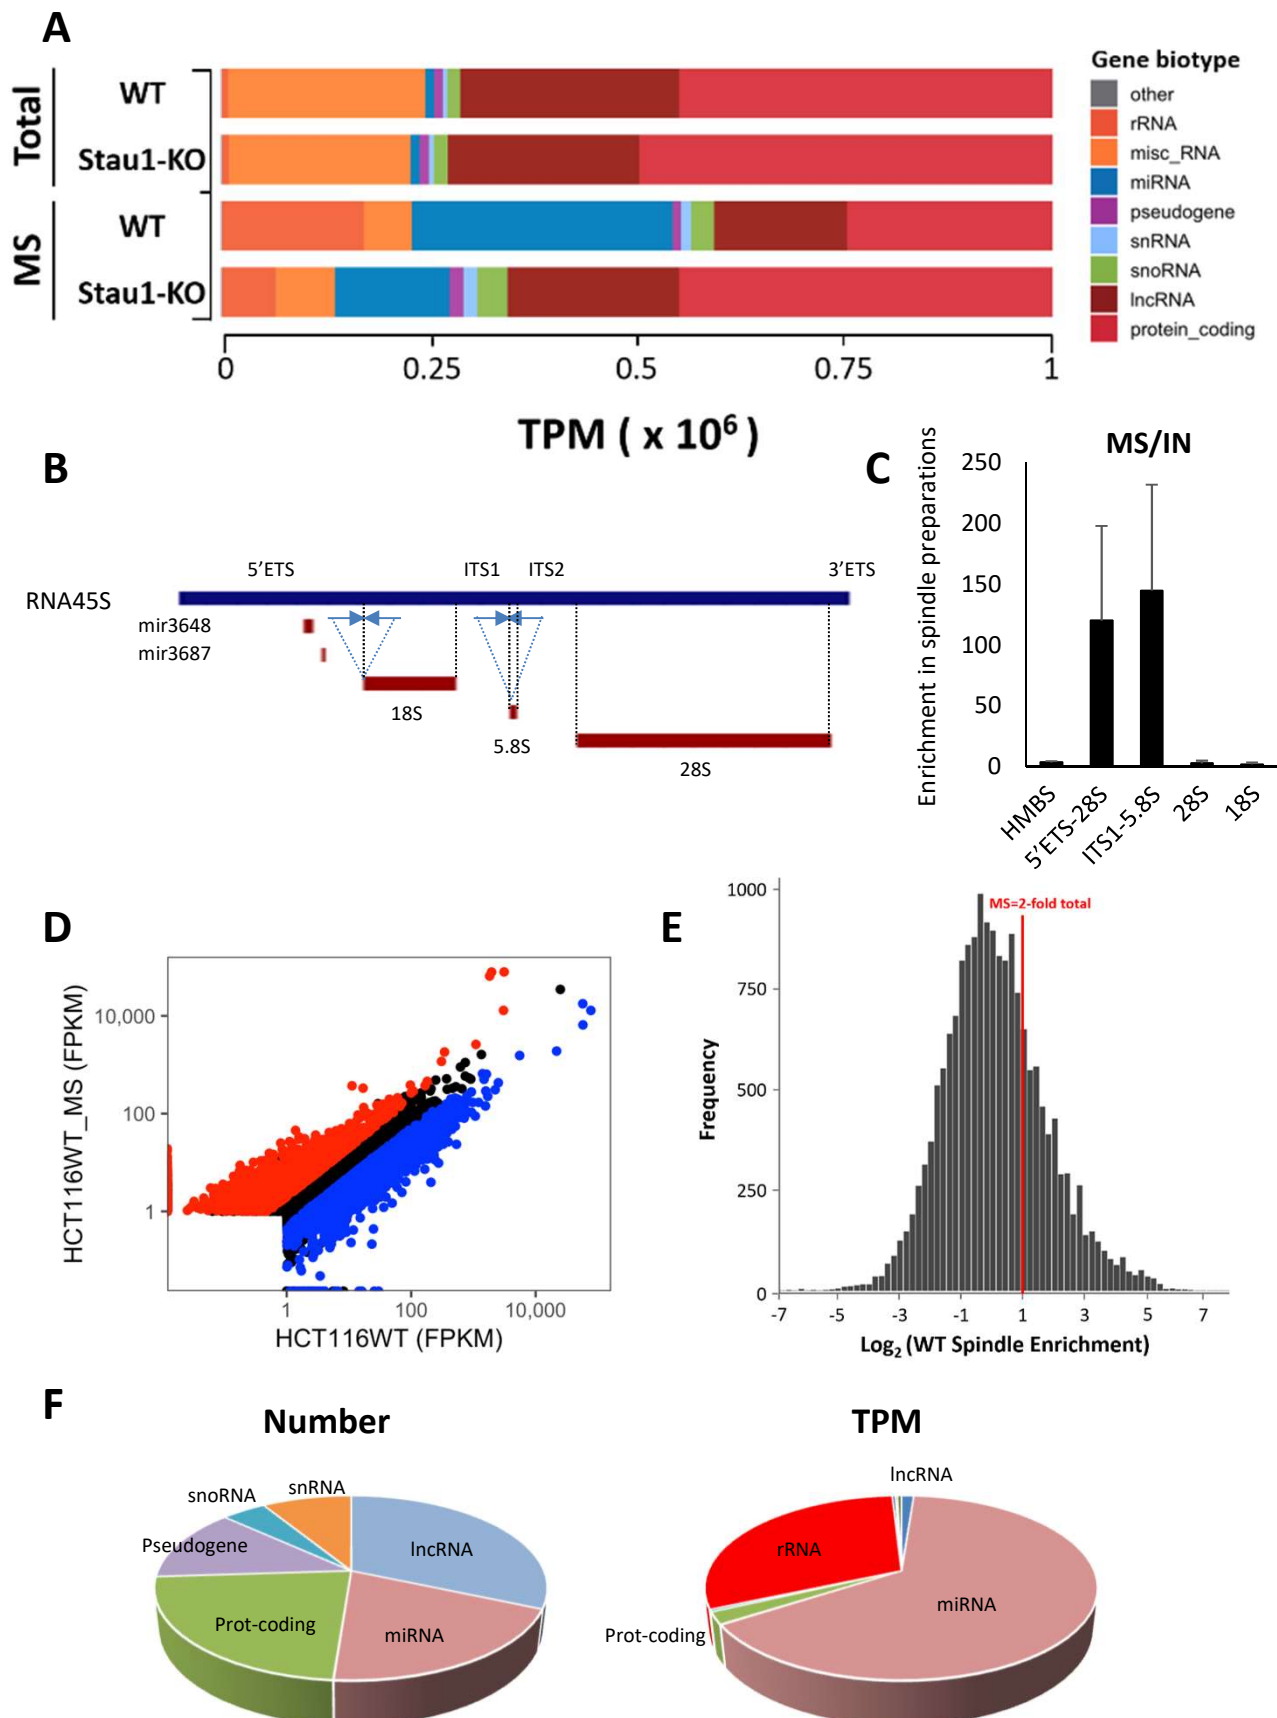

Figure 6

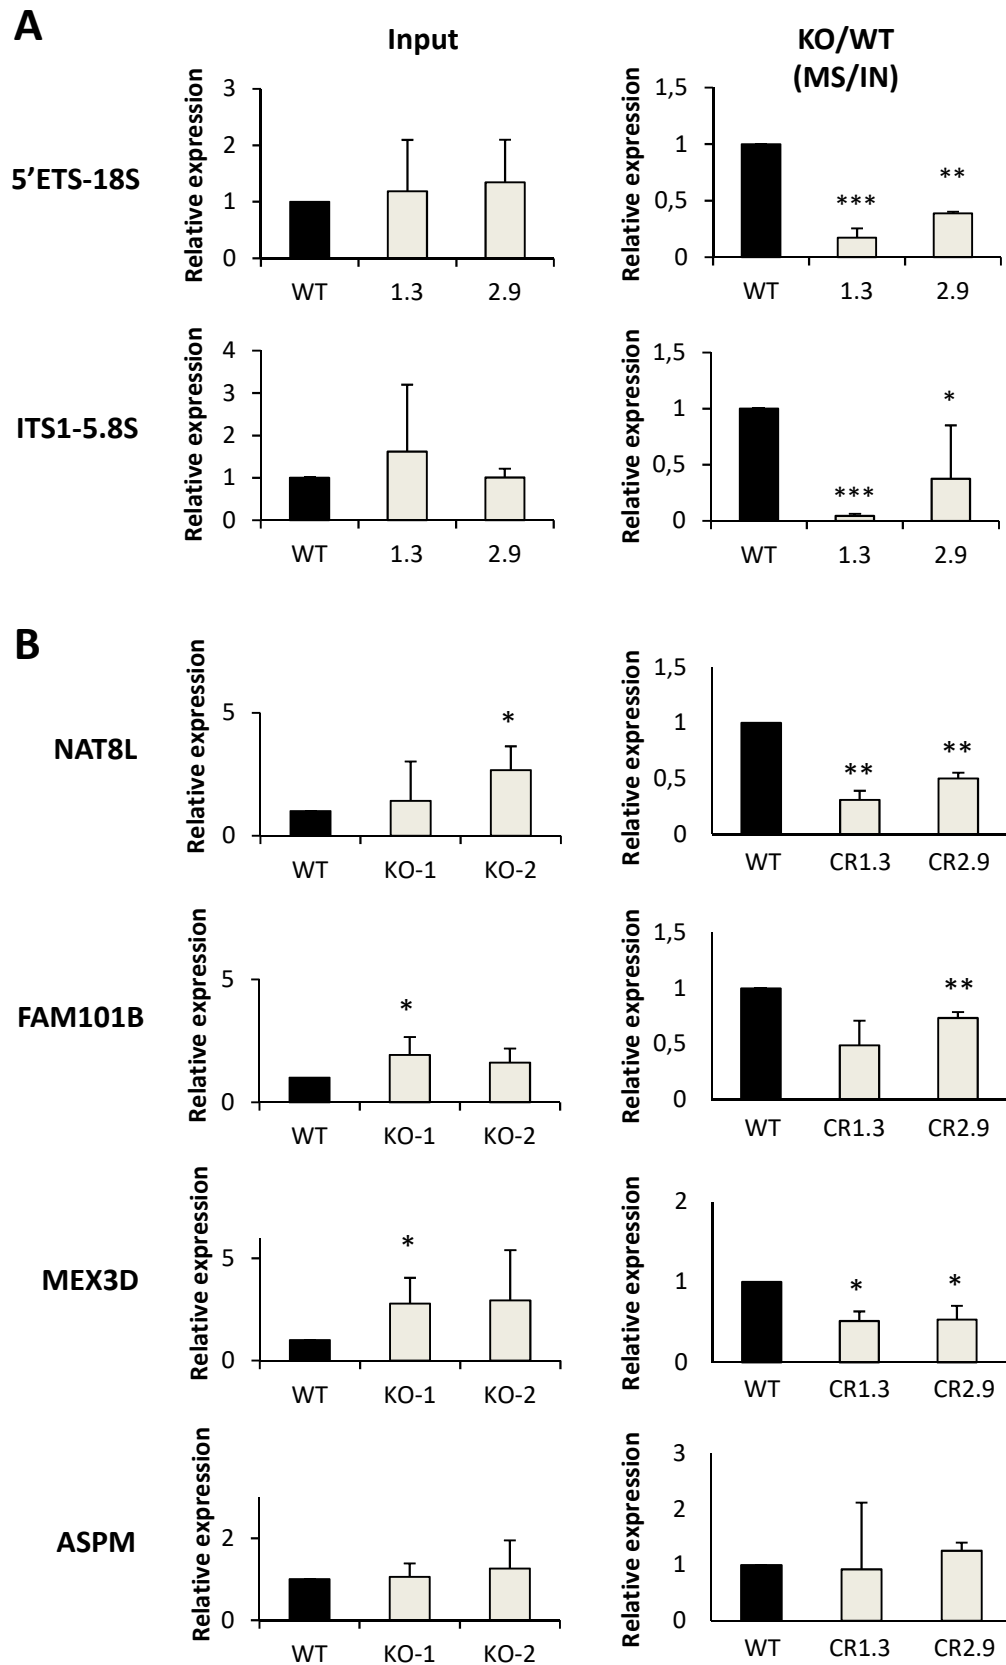



Figure 7

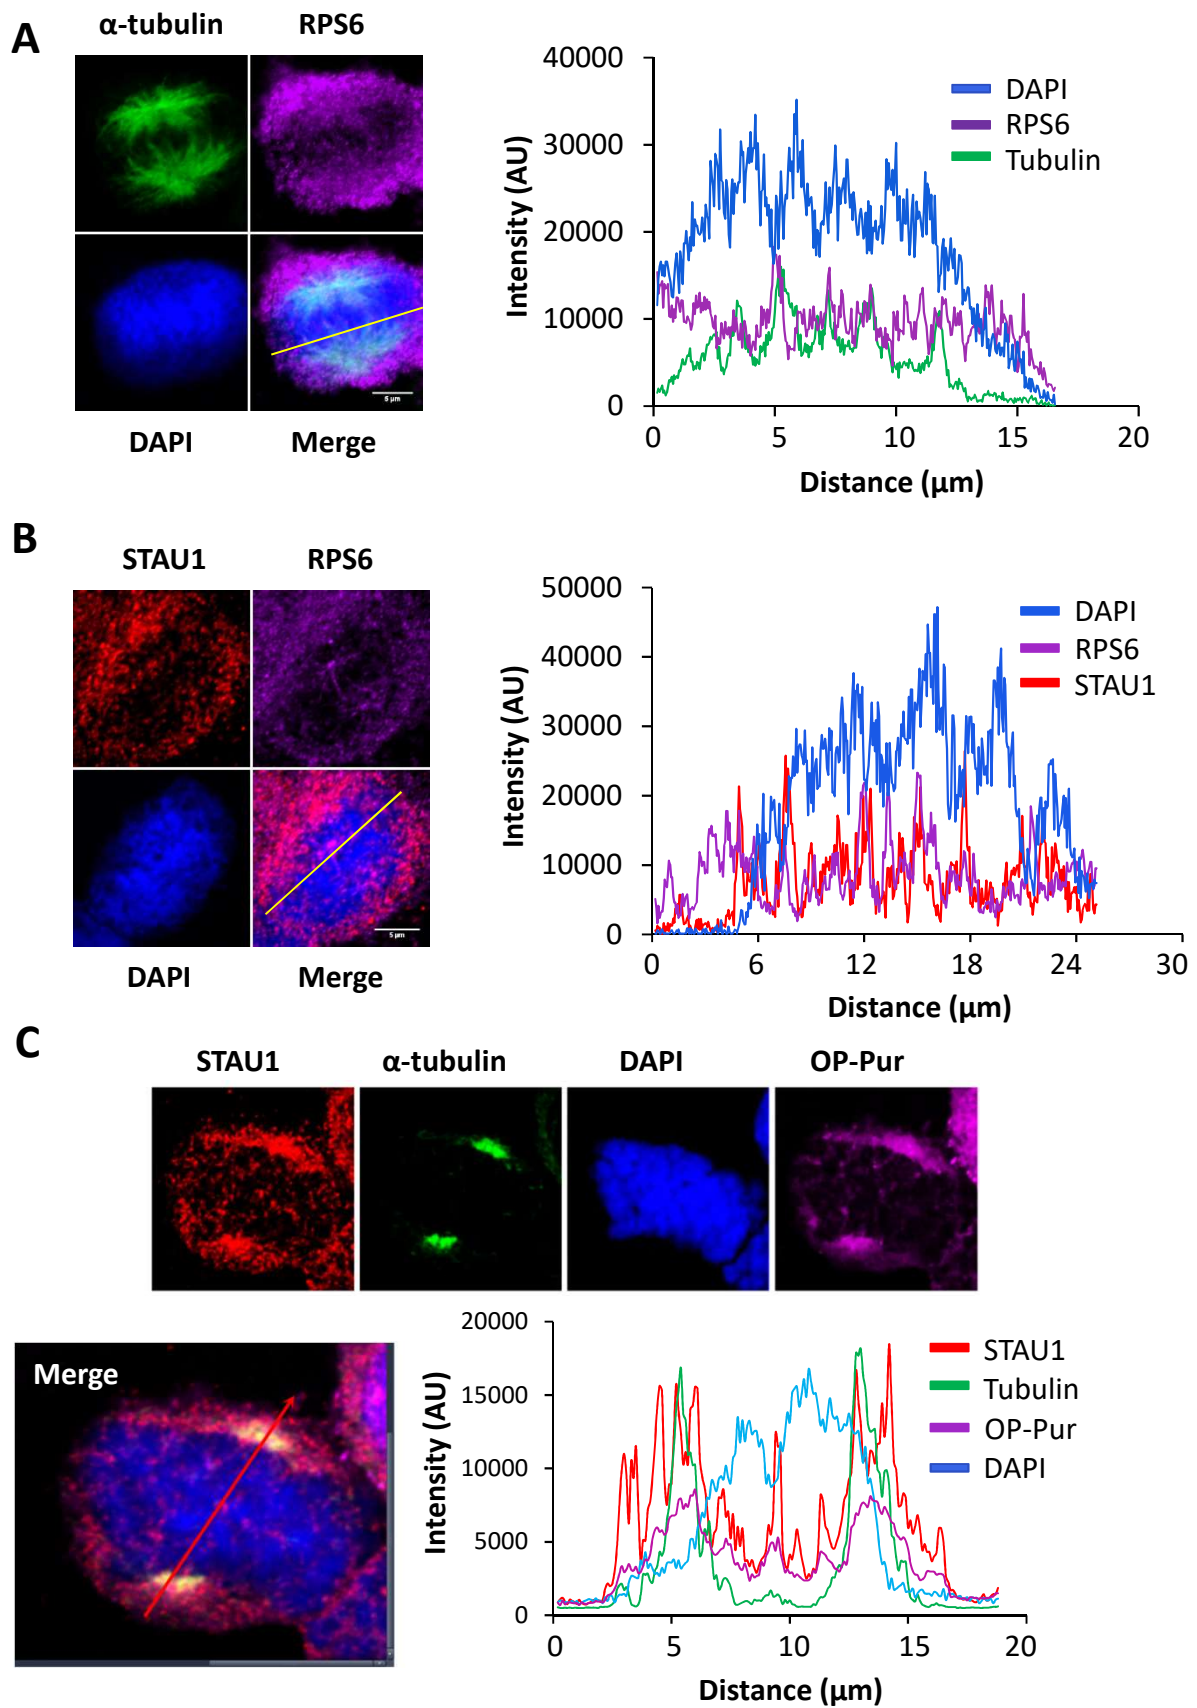

Source: https://www.biorxiv.org/content/10.1101/2020.03.31.019026v1.full.pdf
